# Supplementary material for: Gallium-68–labeled Peptide PET Quantifies Tumor Exposure of PD-L1 Therapeutics
Source: Oxford University Press journal article supplement (doi:10.1158/1078-0432.ccr-22-1931), 2022-11-30
Supplement: ccr-22-1931_supplementary_figure_s1_supps1.docx [file ccr-22-1931_supplementary_figure_s1_supps1.docx]

**Supplementary Figures**


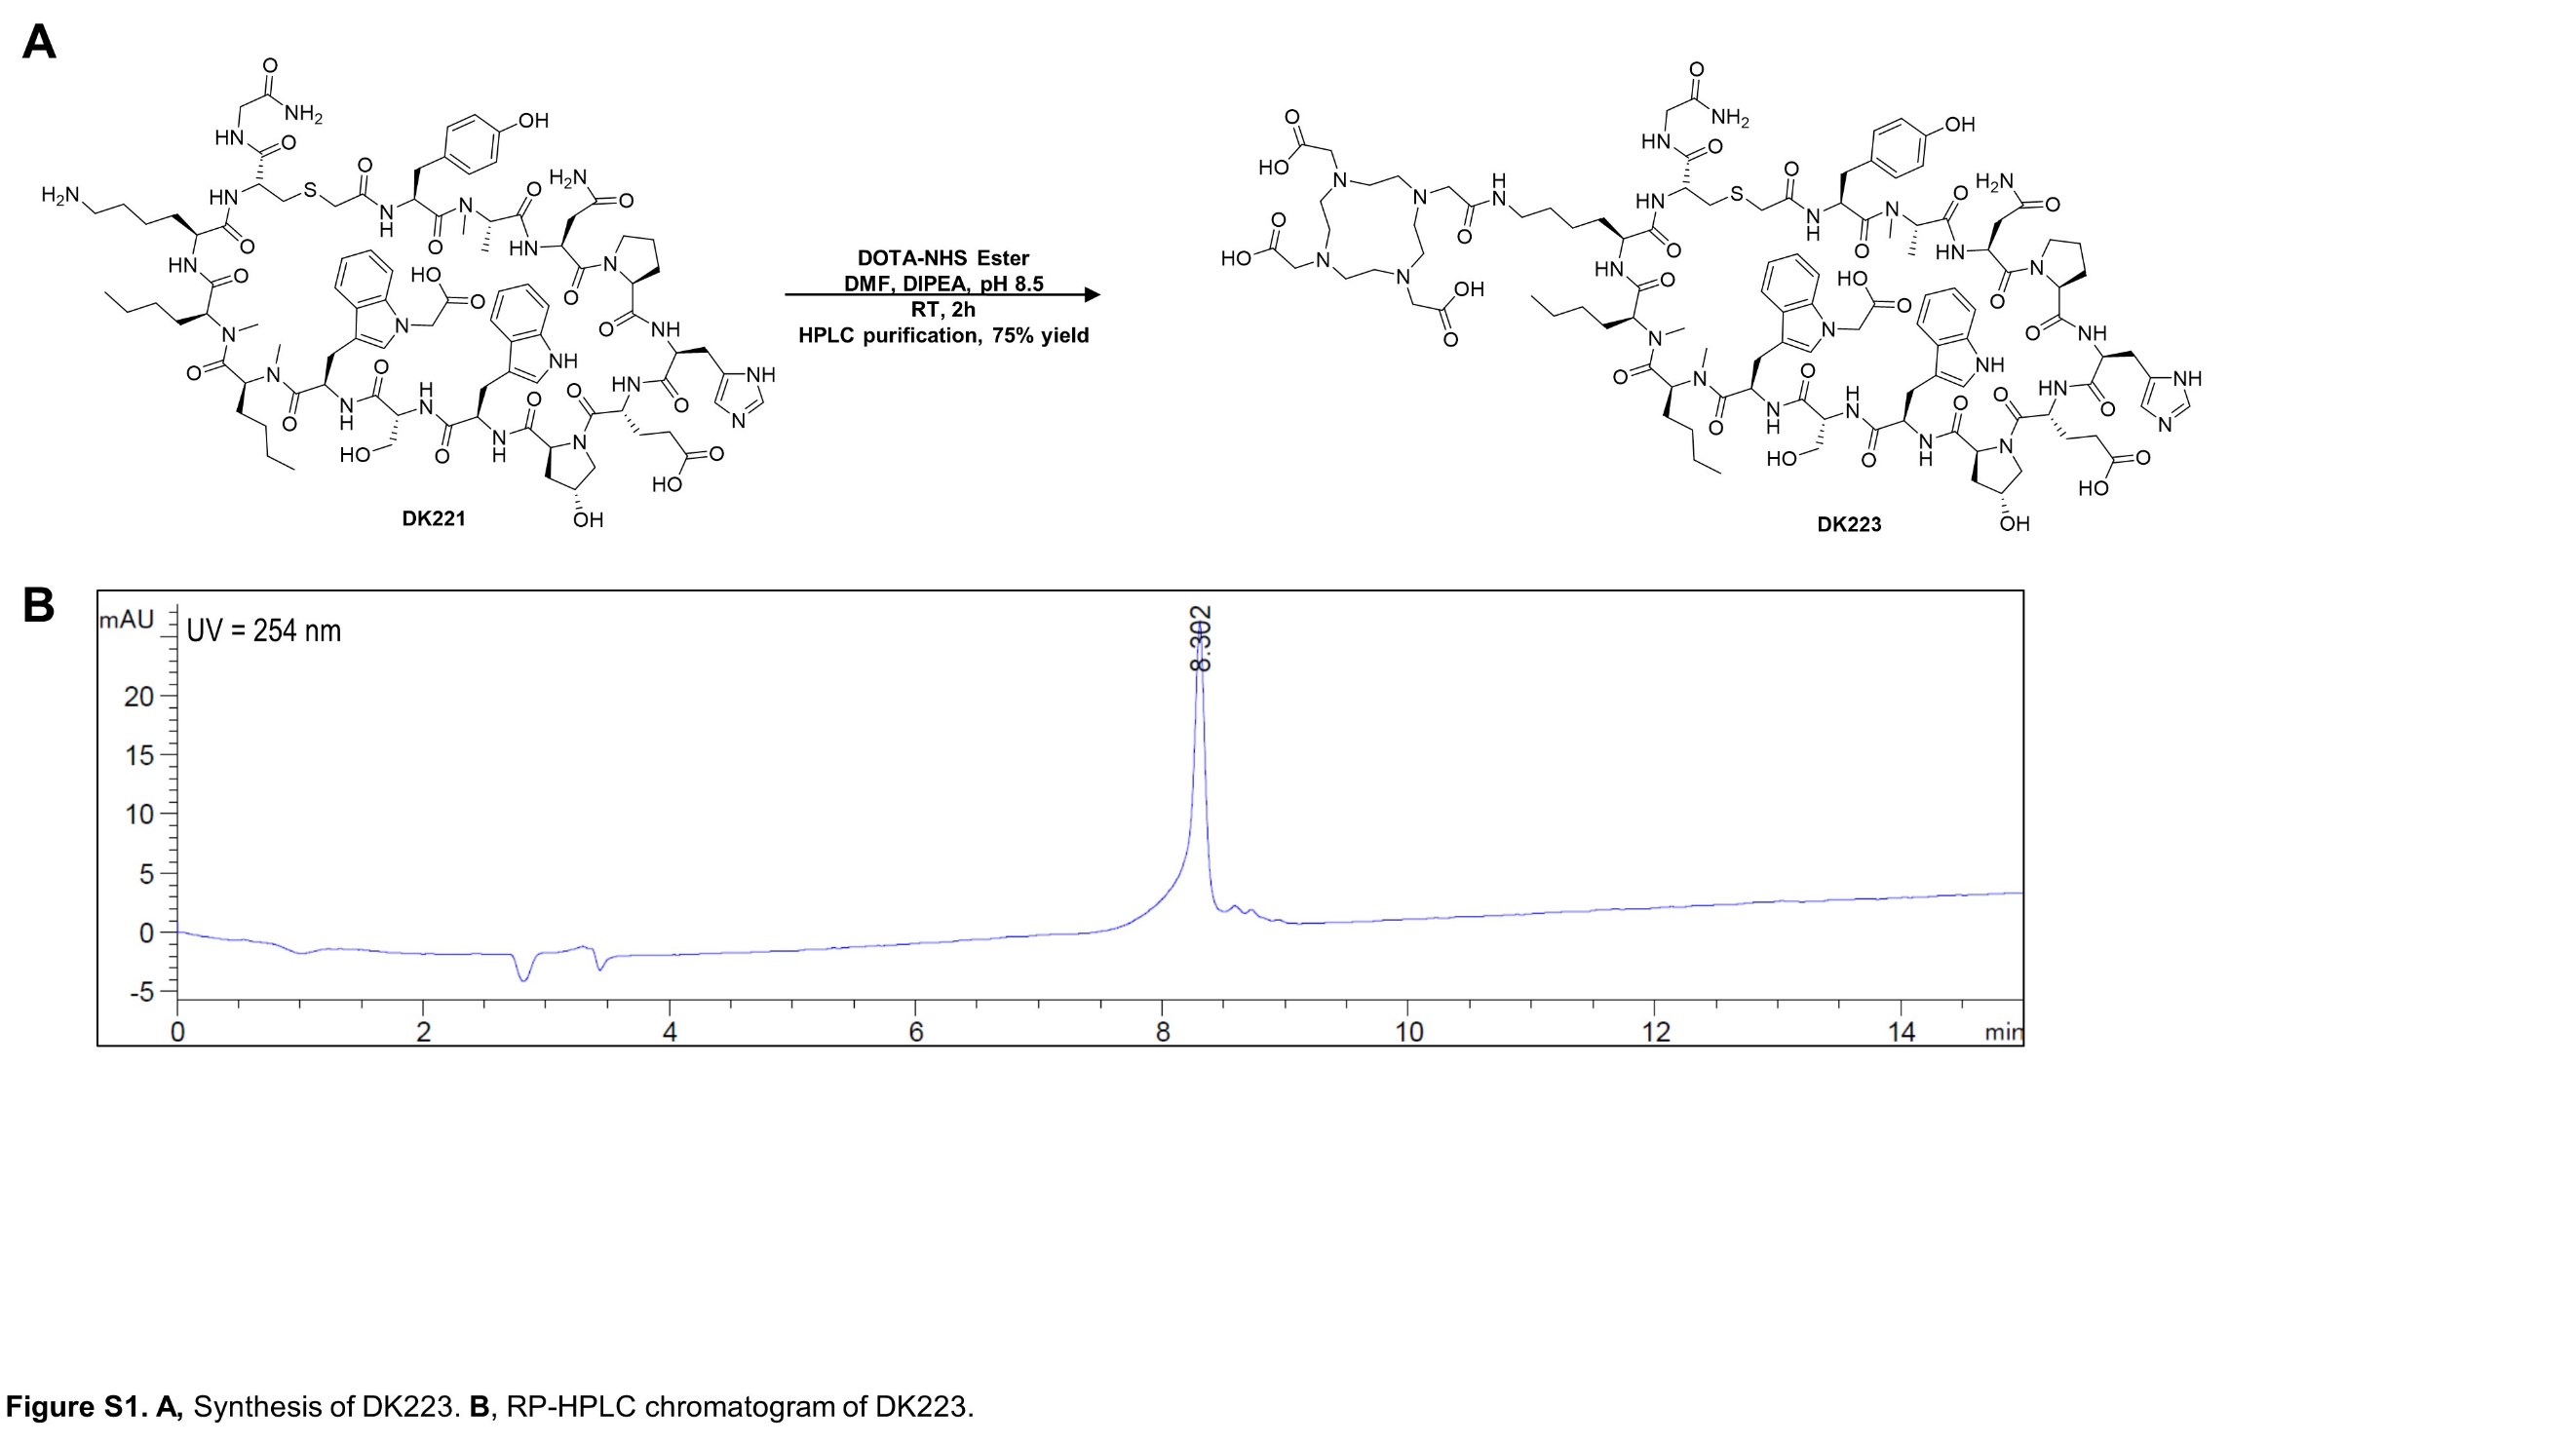


**Figure S1. A,** Synthesis of DK223. **B**, RP-HPLC chromatogram of DK223.


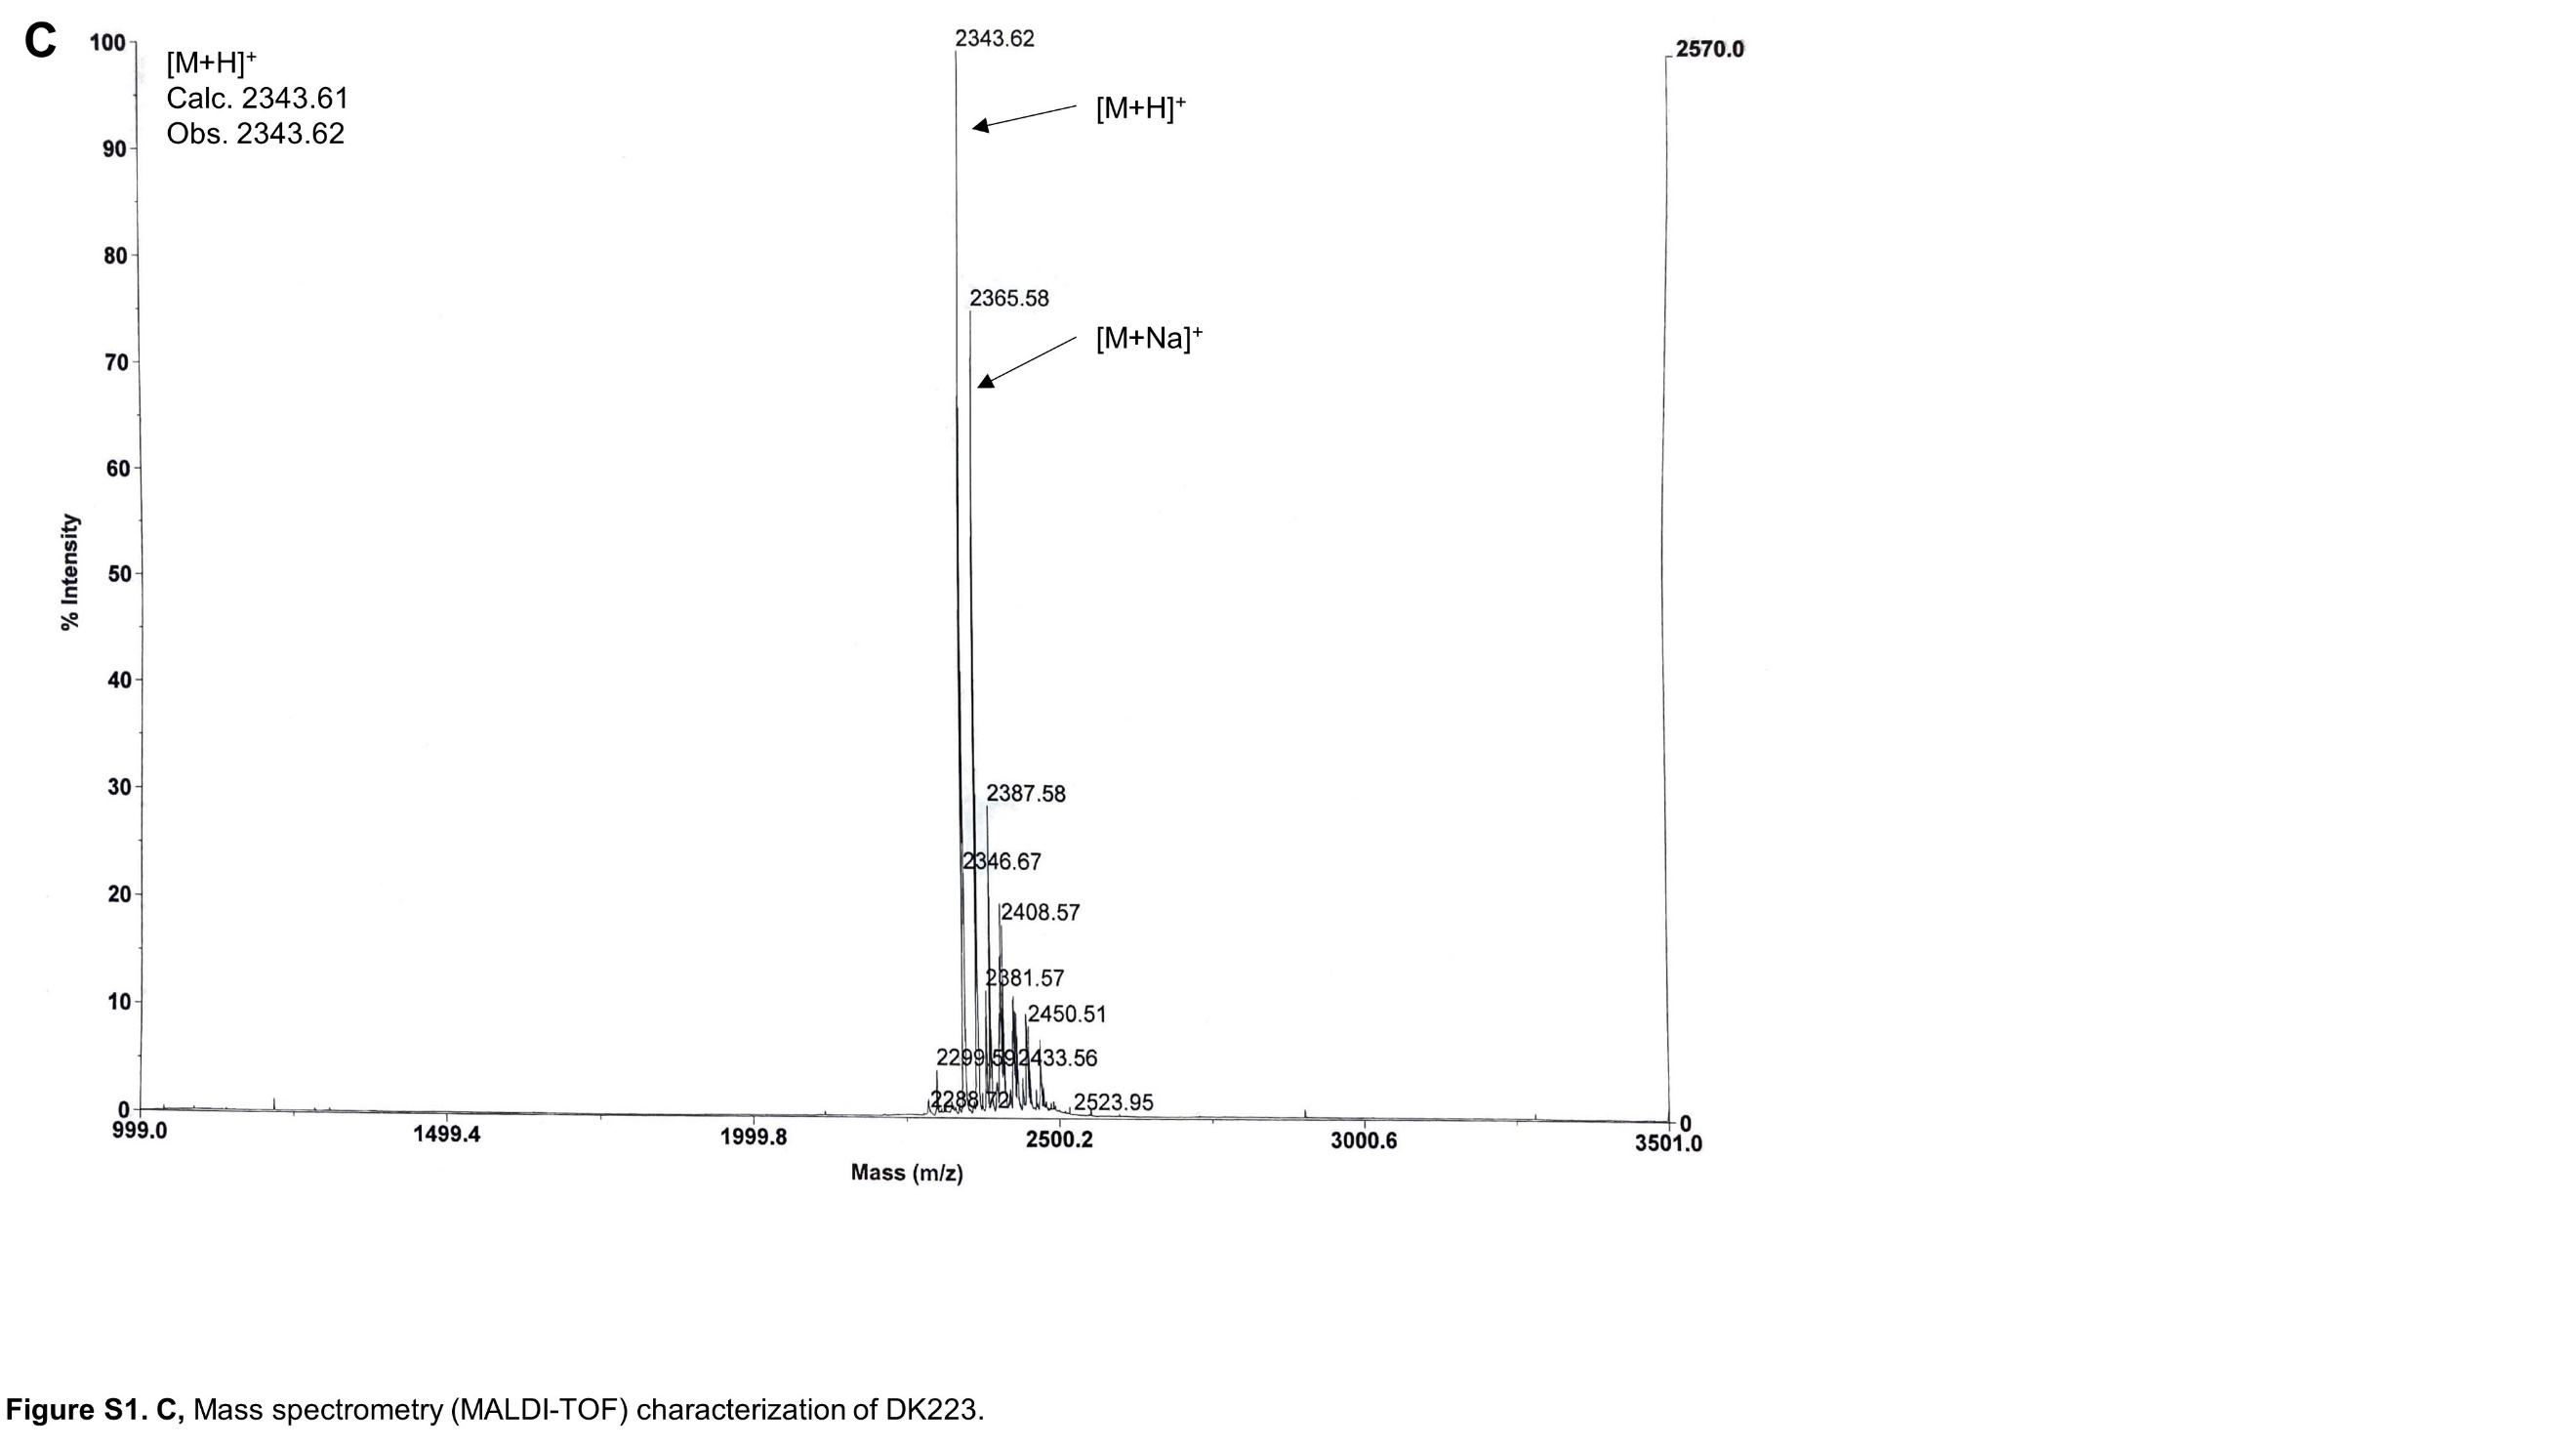


**Figure S1. C,** Mass spectrometry (MALDI-TOF) characterization of DK223.


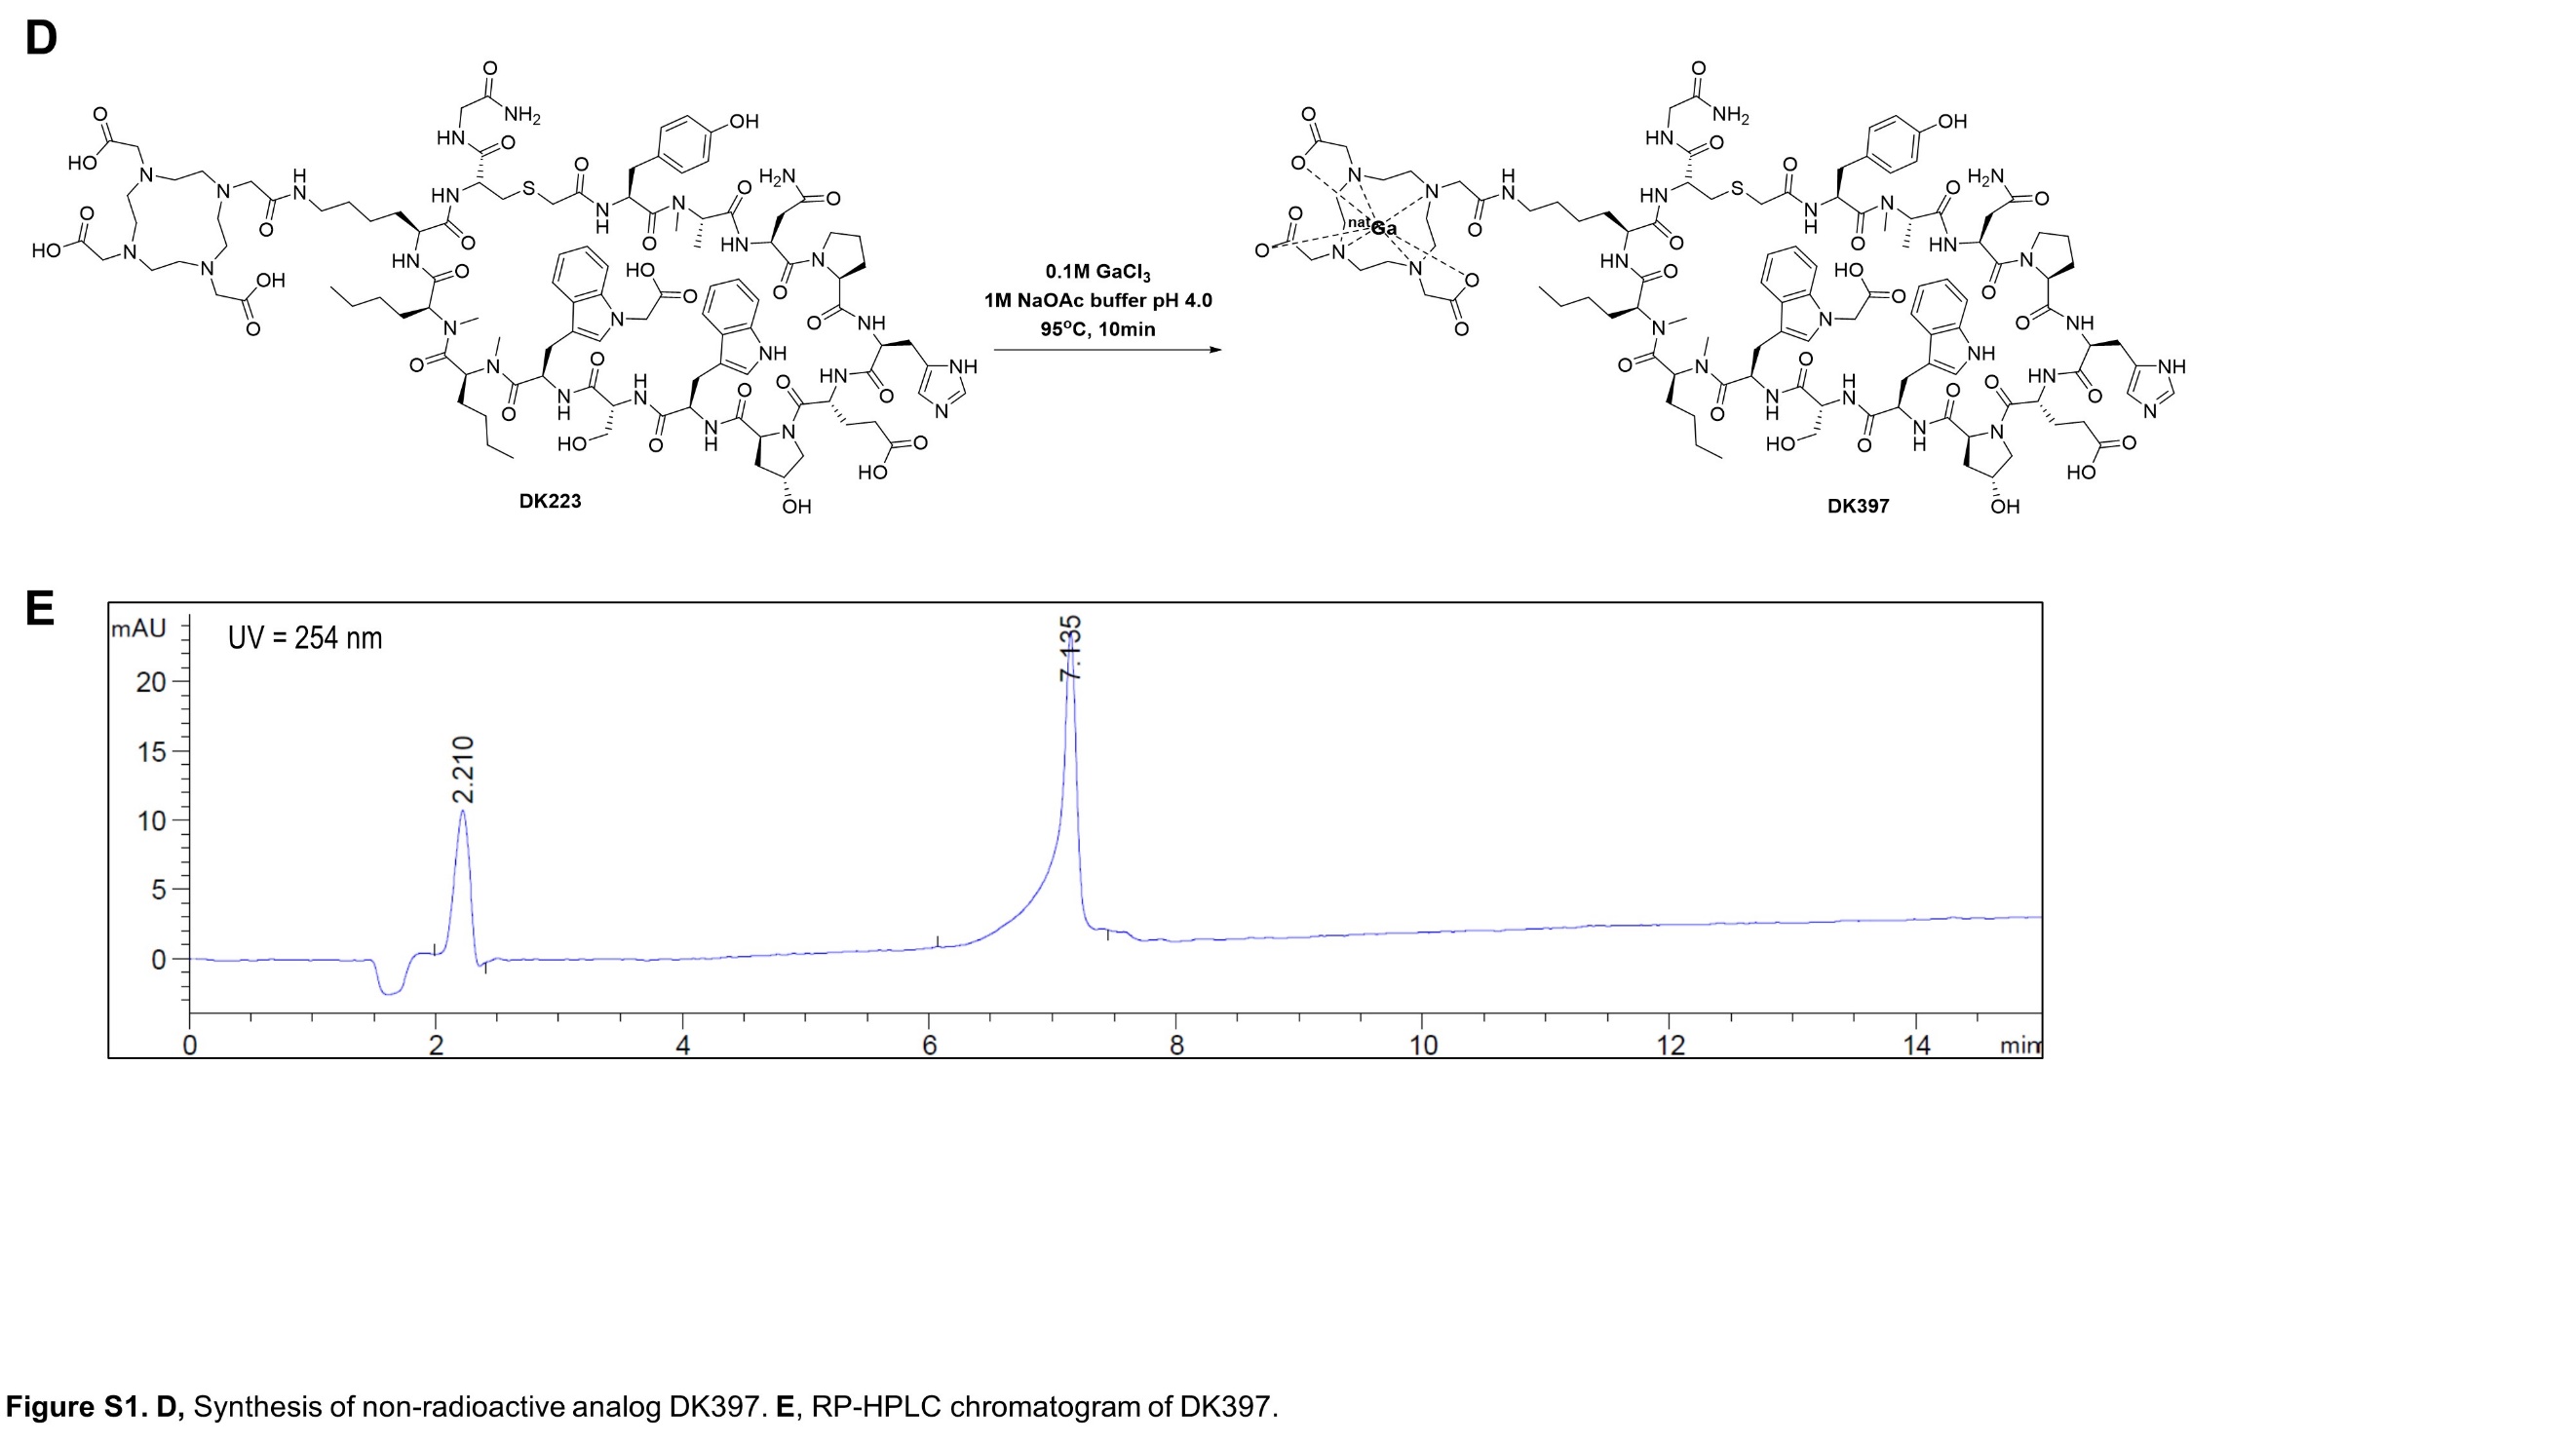


**Figure S1. D,** Synthesis of non-radioactive analog DK397. **E**, RP-HPLC chromatogram of DK397.


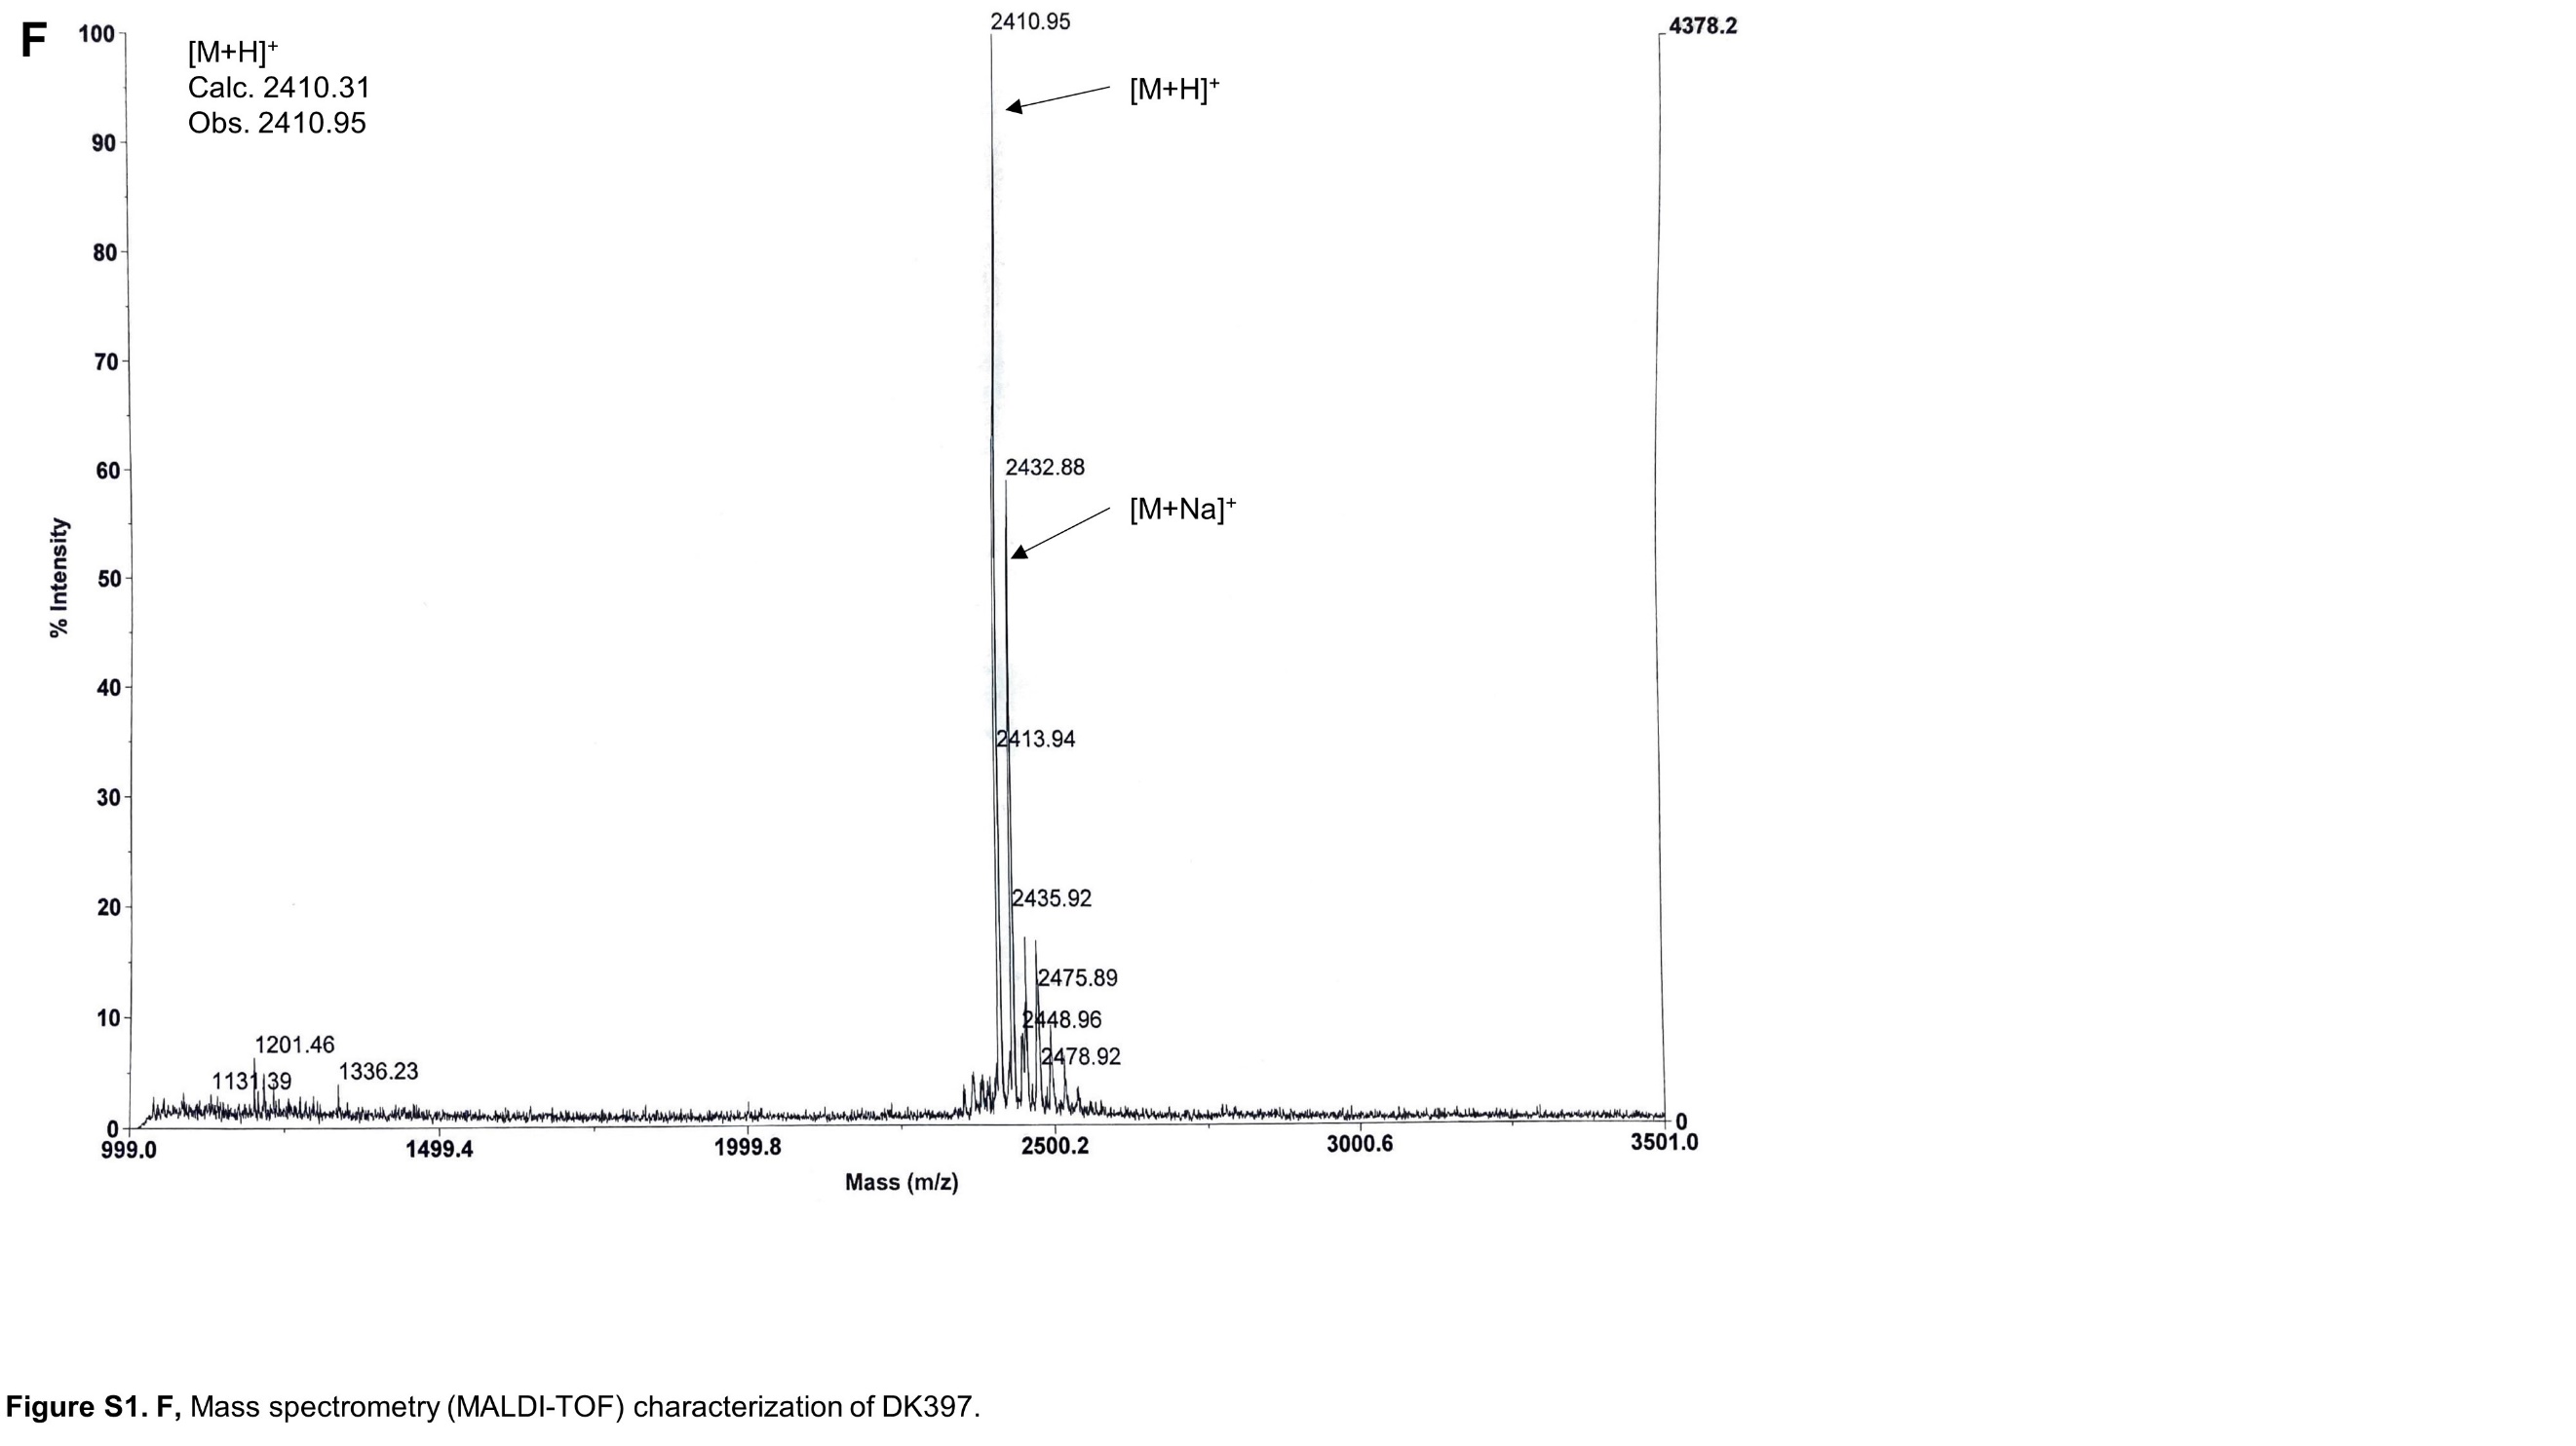


**Figure S1. F,** Mass spectrometry (MALDI-TOF) characterization of DK397.


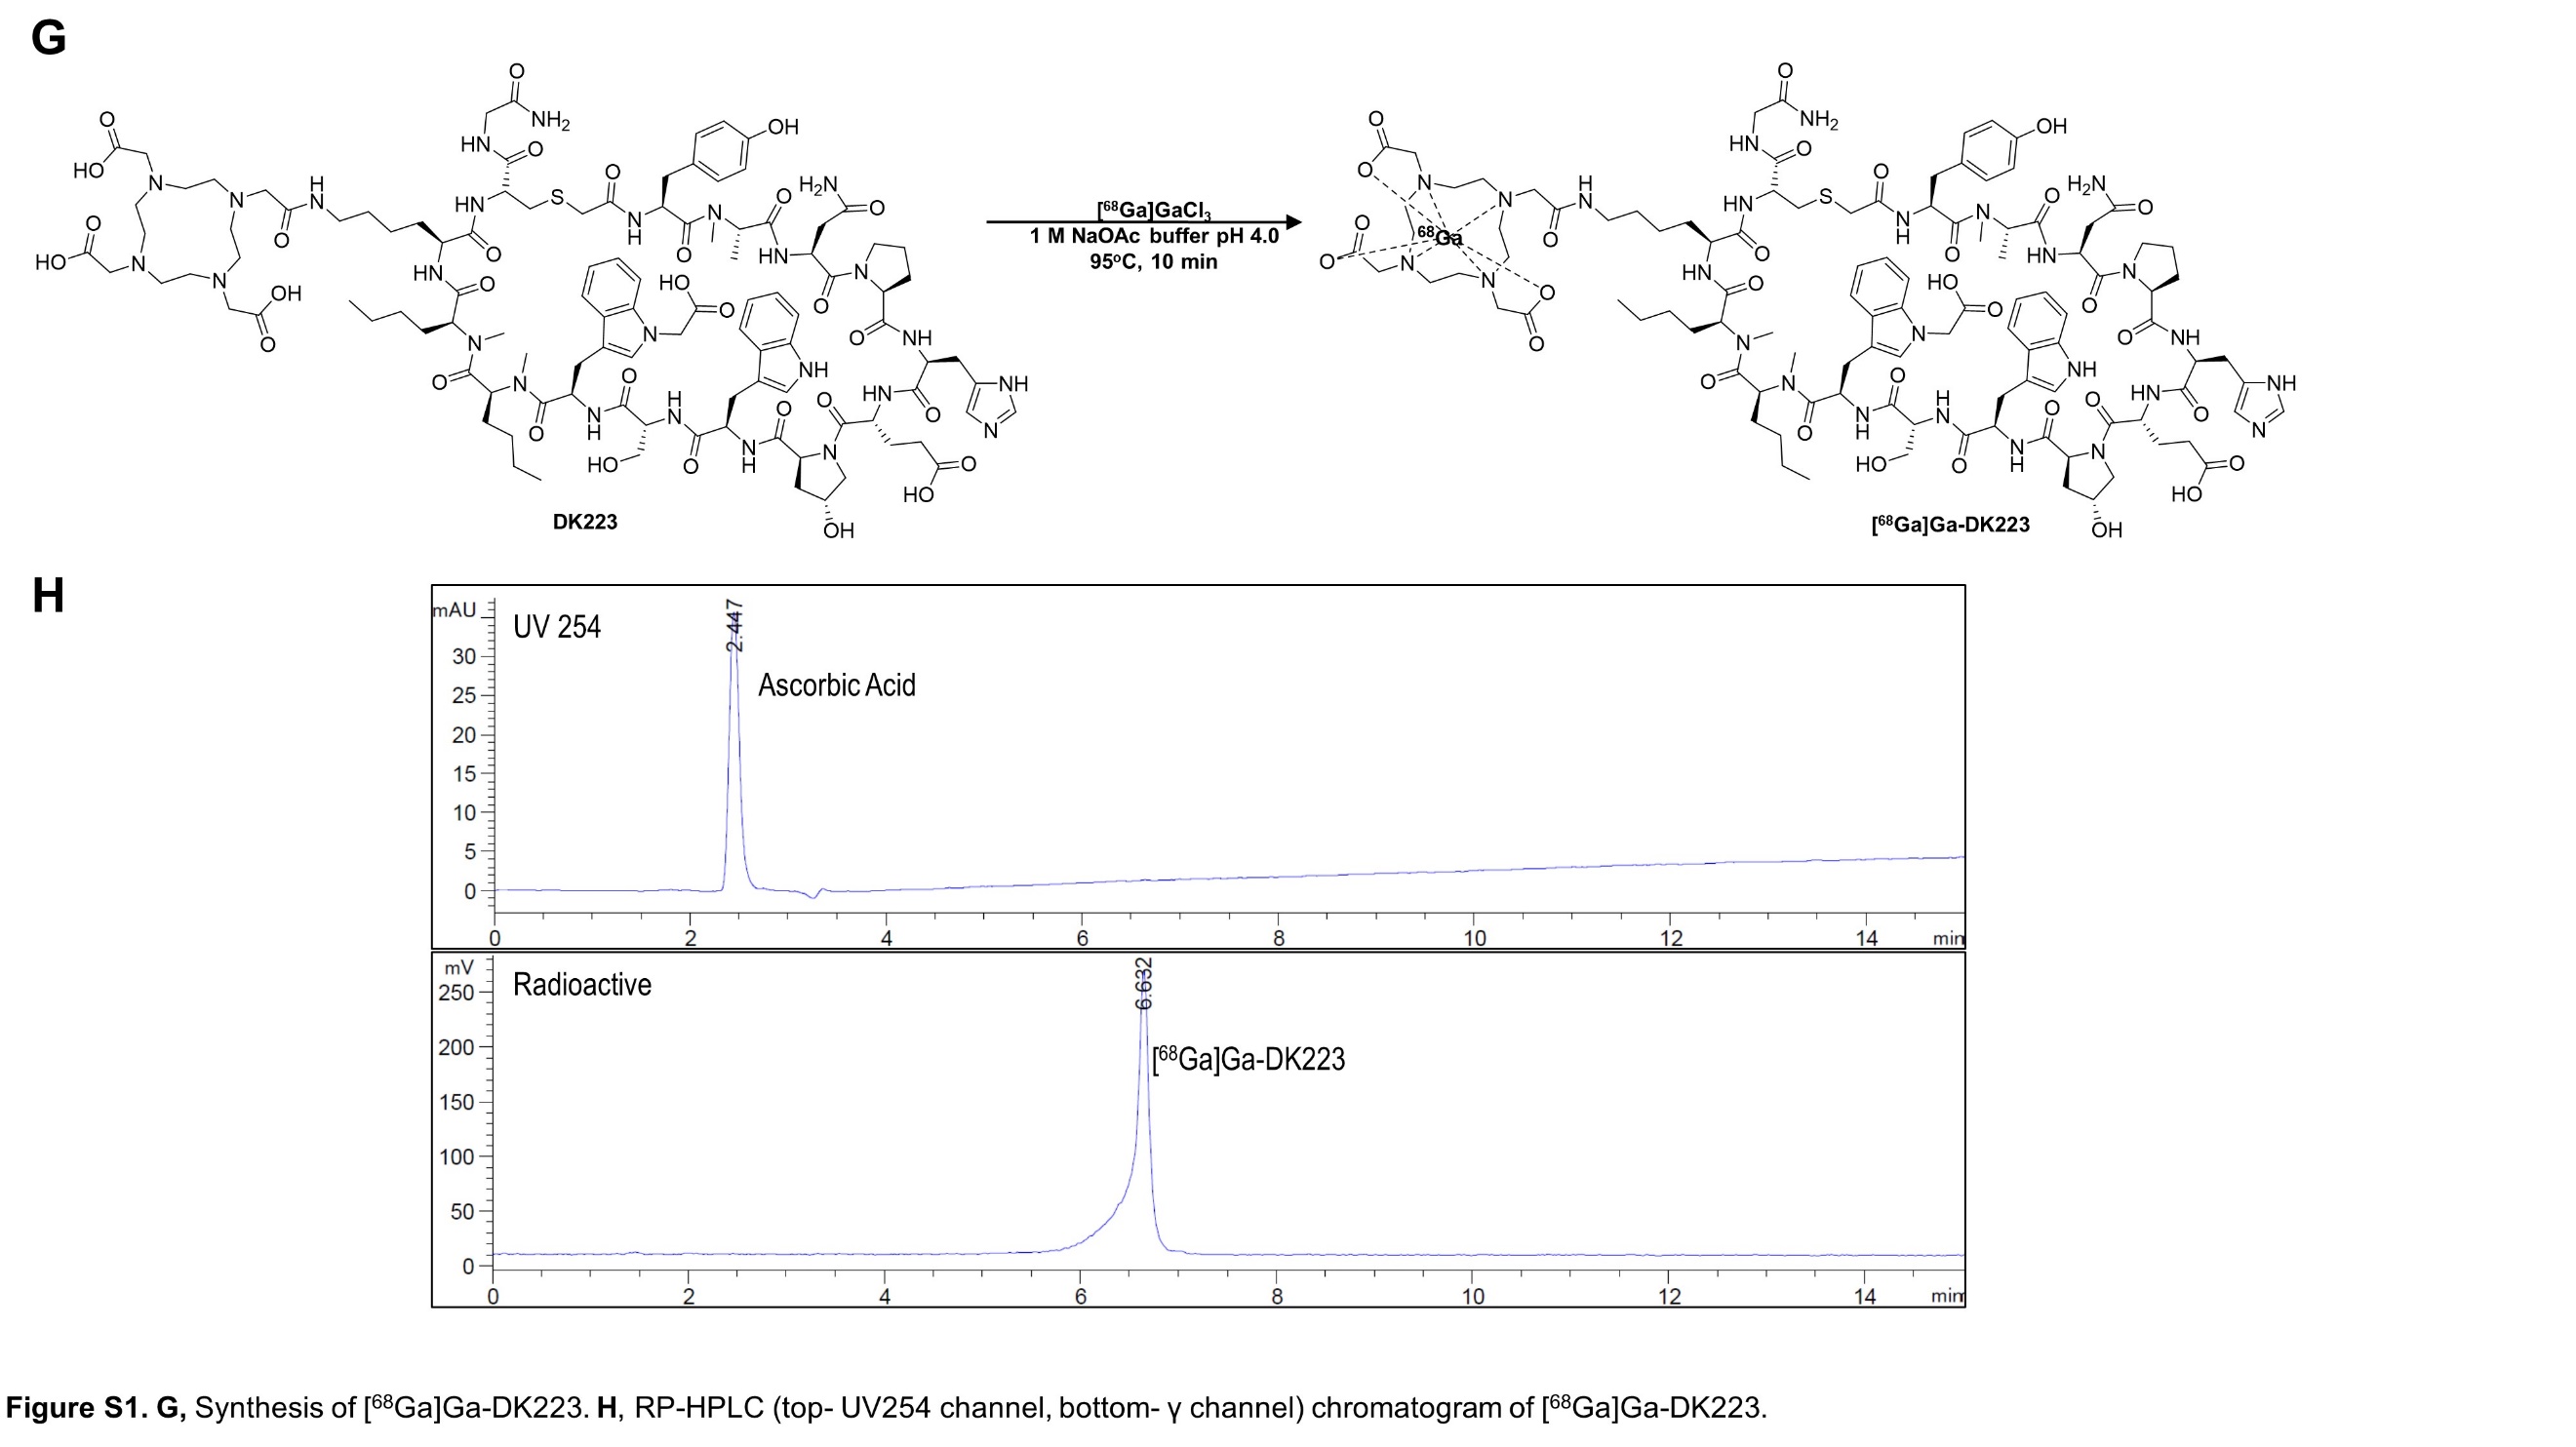


**Figure S1. G,** Synthesis of [68Ga]Ga-DK223. **H**, RP-HPLC chromatogram of [68Ga]Ga-DK223.


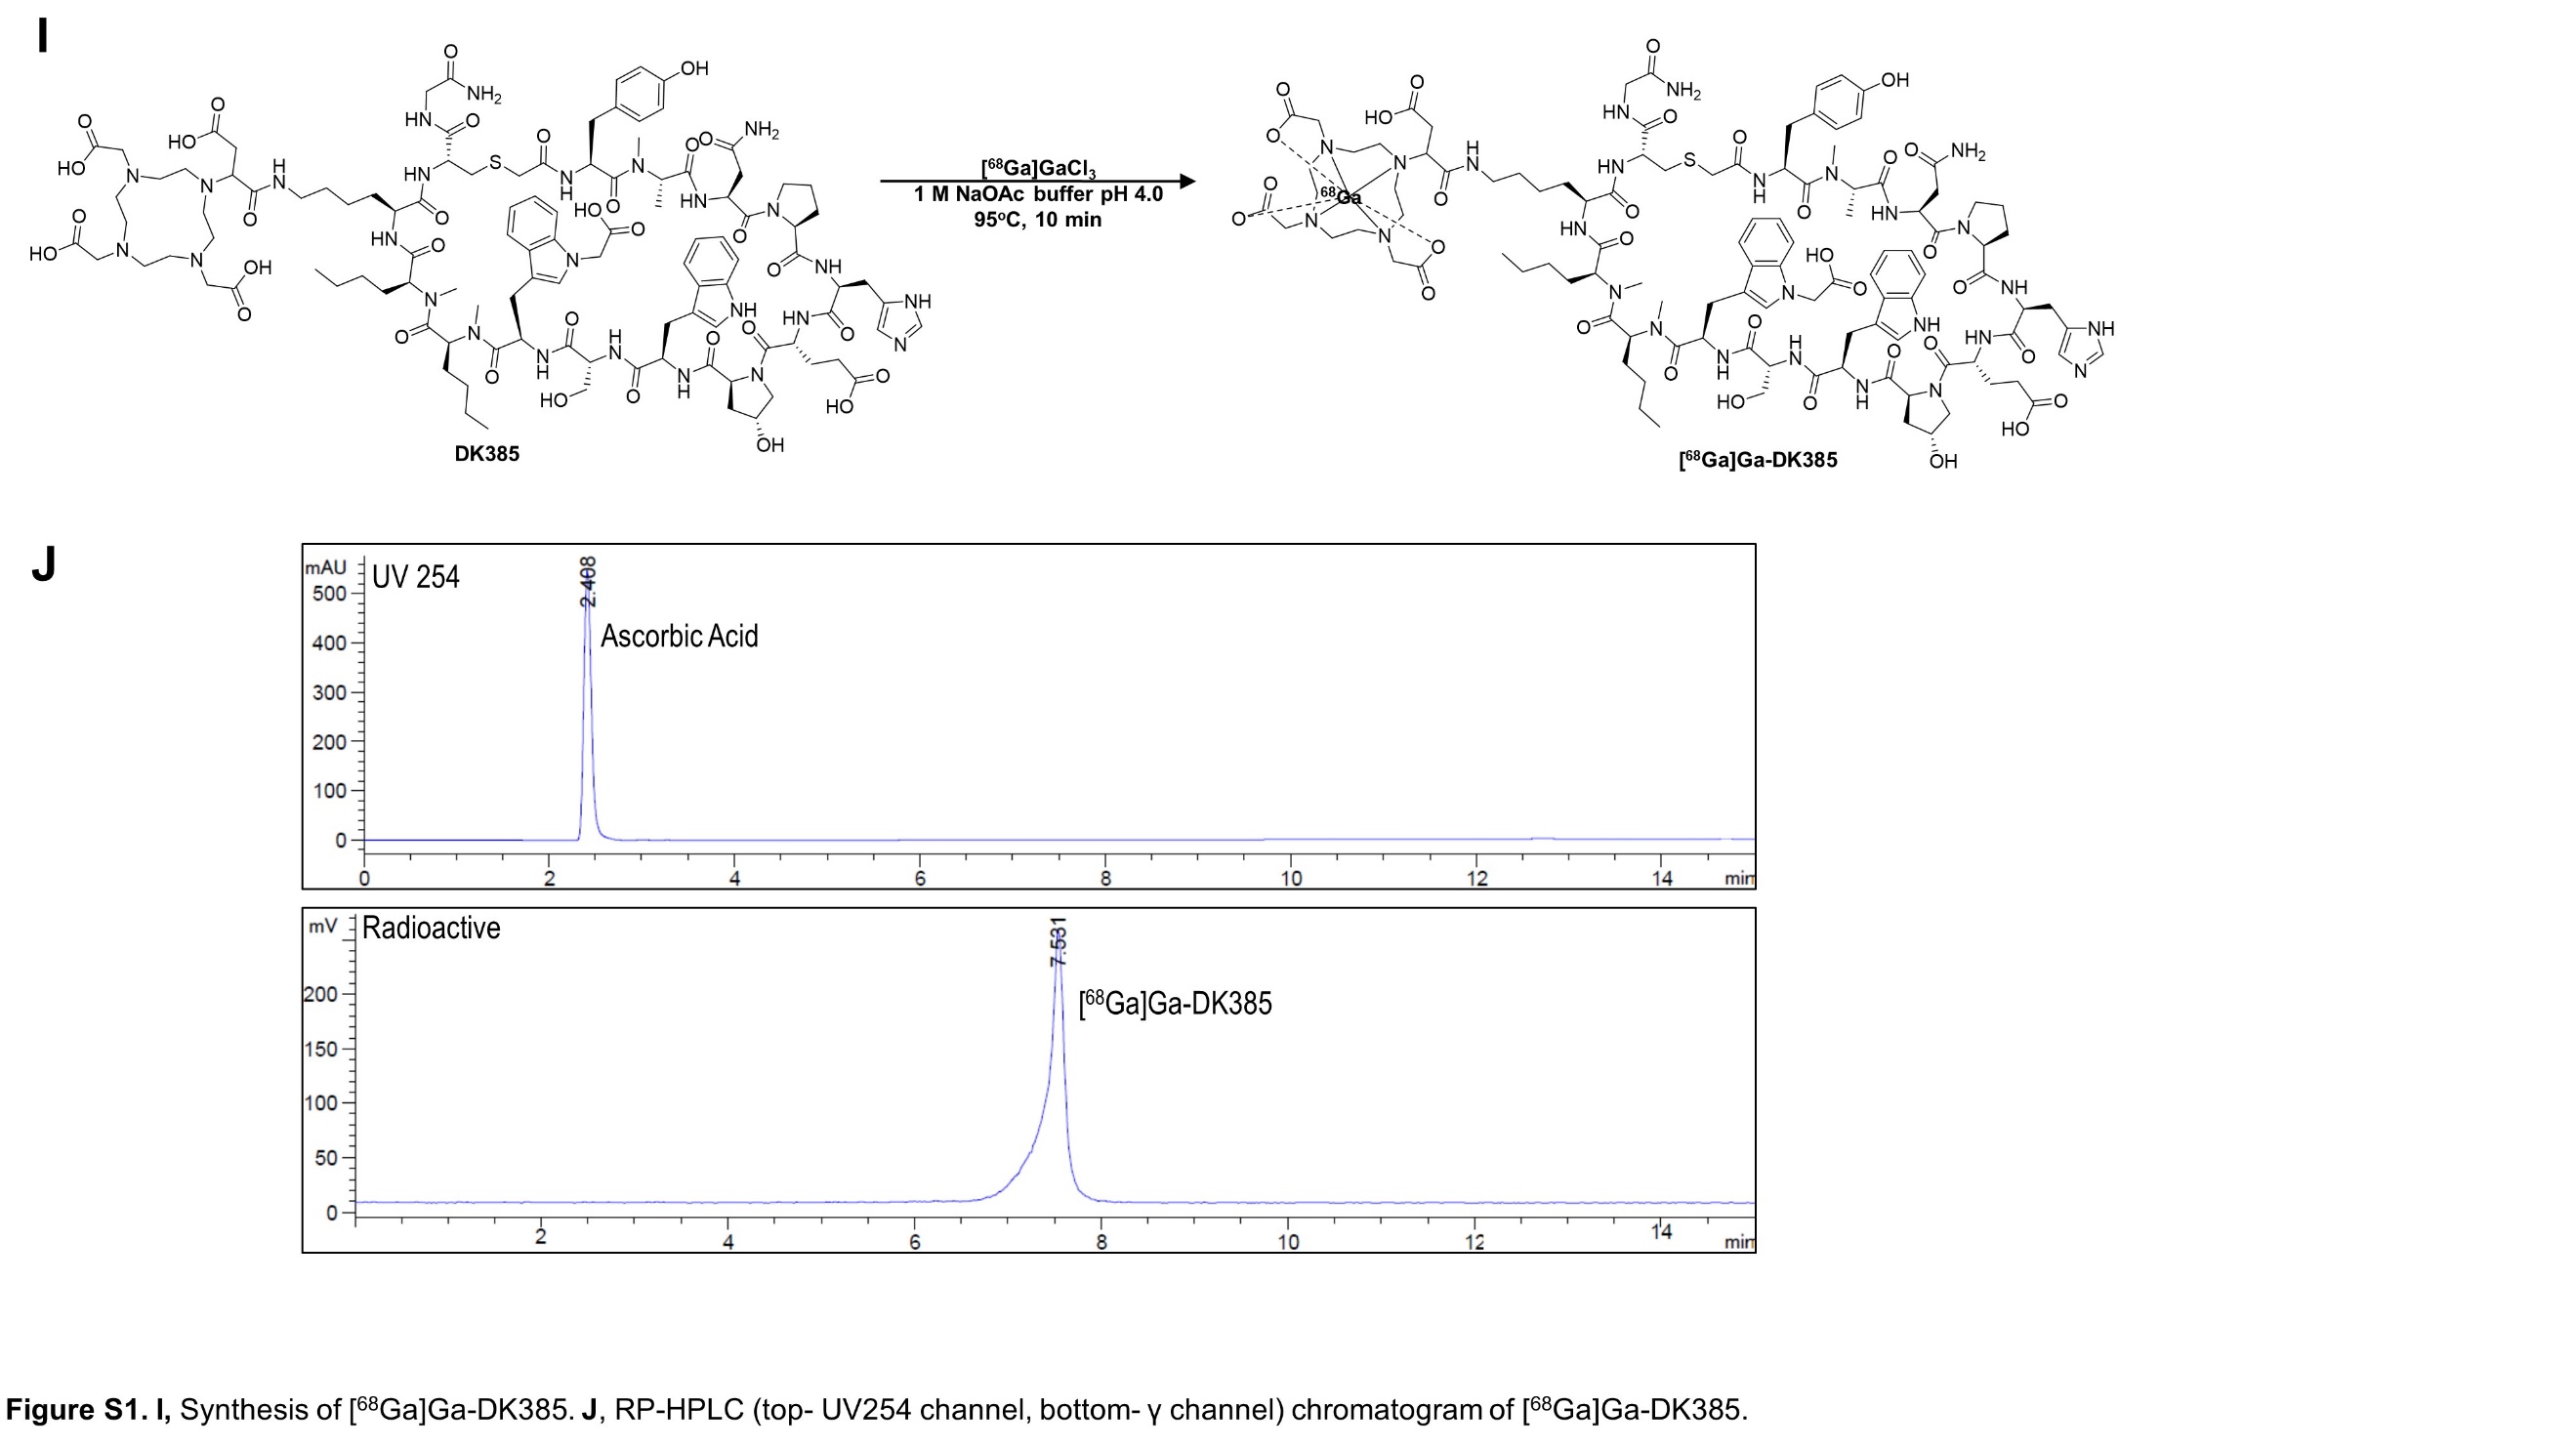


**Figure S1. I,** Synthesis of [68Ga]Ga-DK385. **J**, RP-HPLC chromatogram of [68Ga]Ga-DK385.


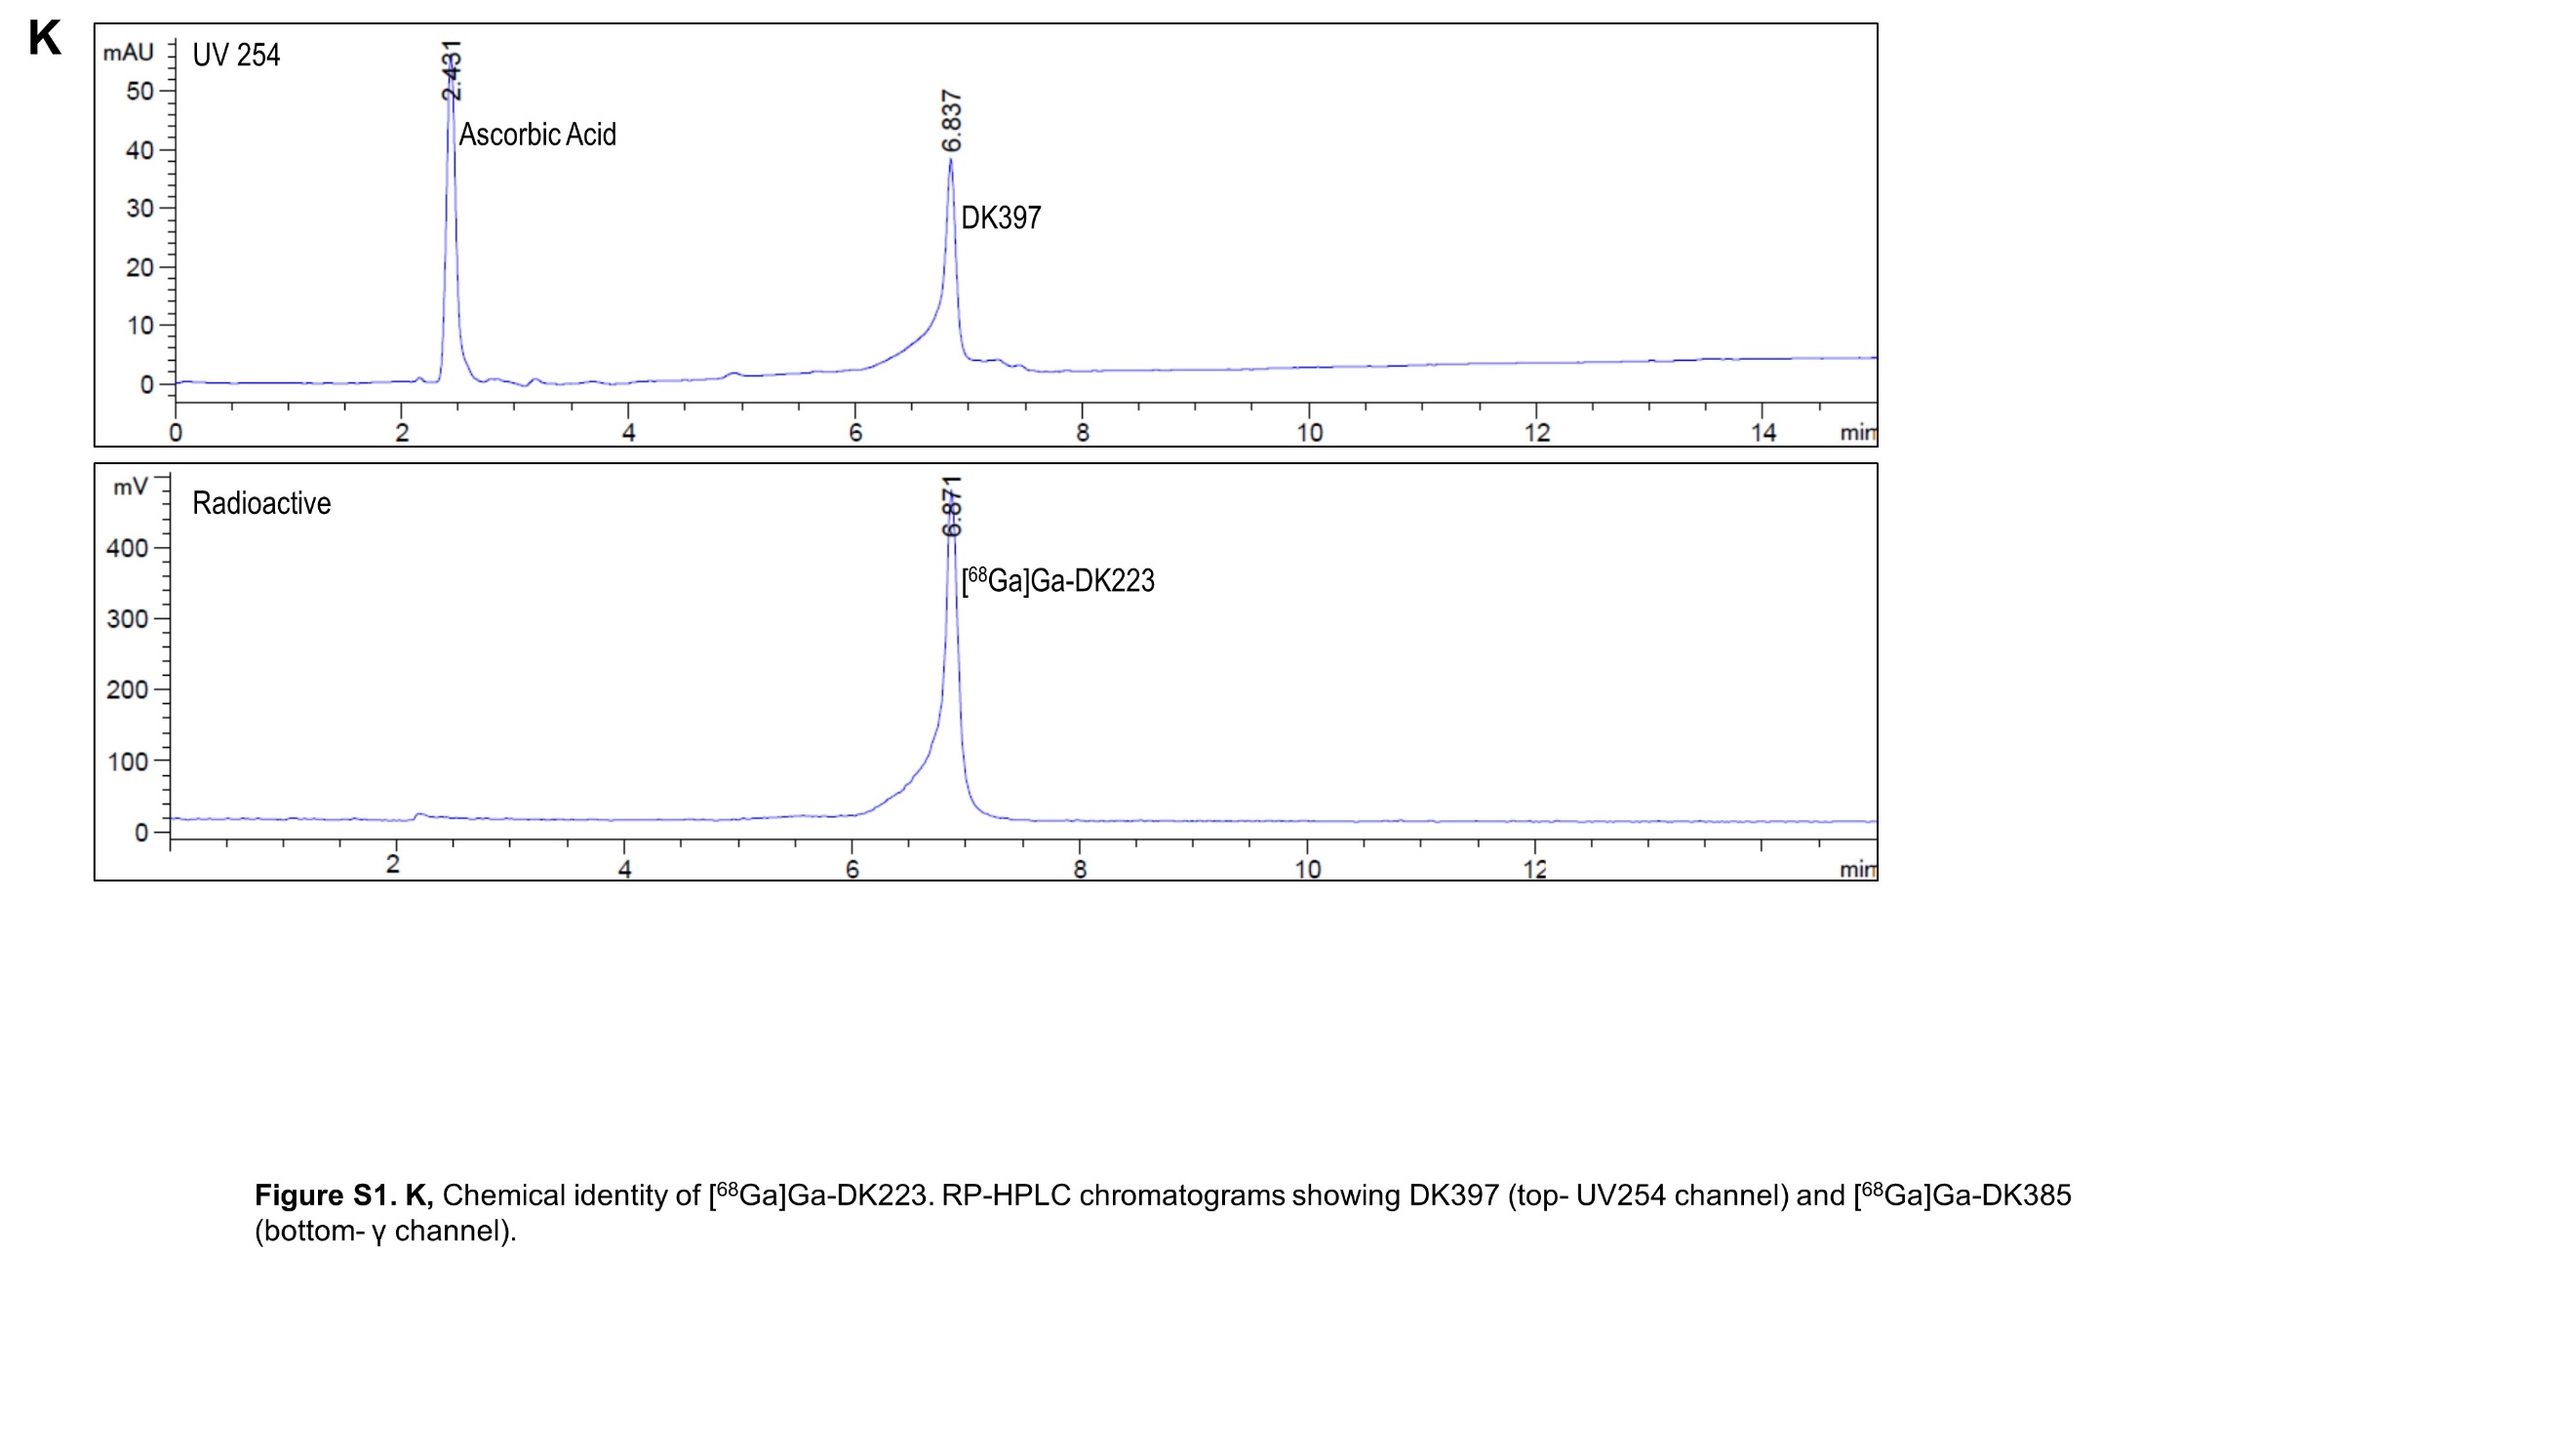


**Figure S1. K,** Chemical identity of [68Ga]Ga-DK223. RP-HPLC chromatogram of [68Ga]Ga-DK223 co-injected with DK397.


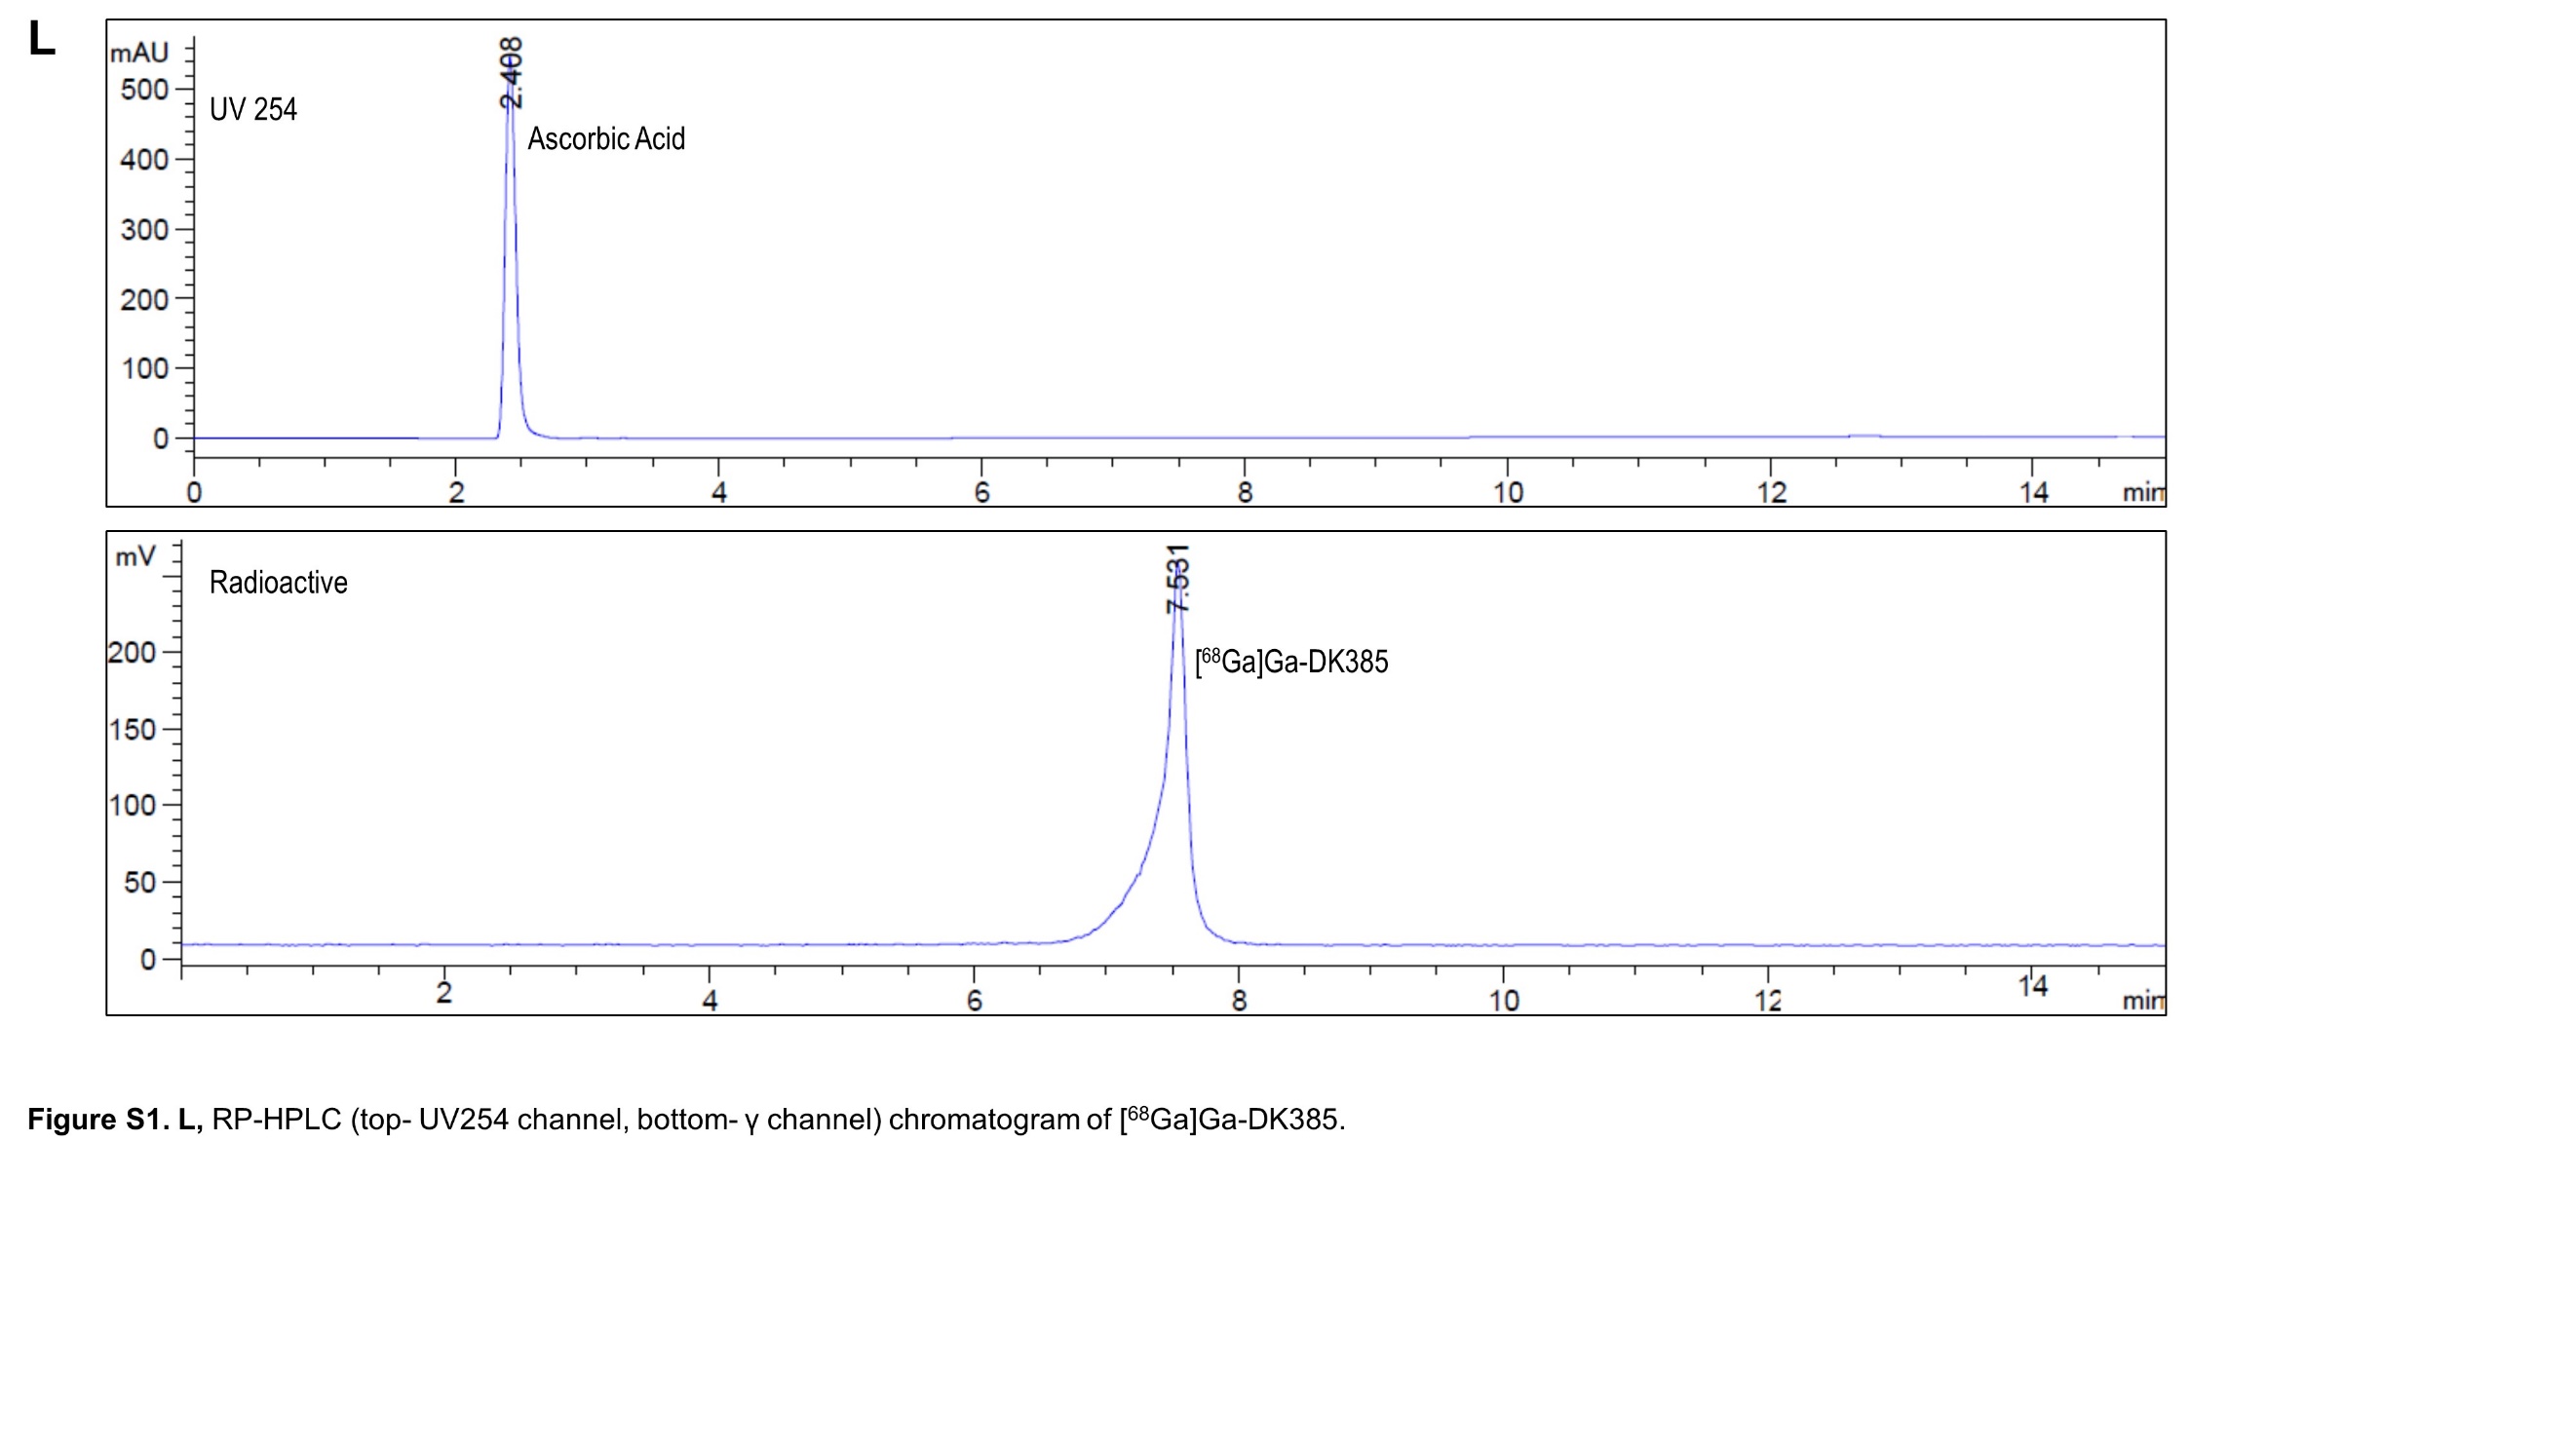


**Figure S1. L,** RP-HPLC chromatogram of [68Ga]Ga-DK385.


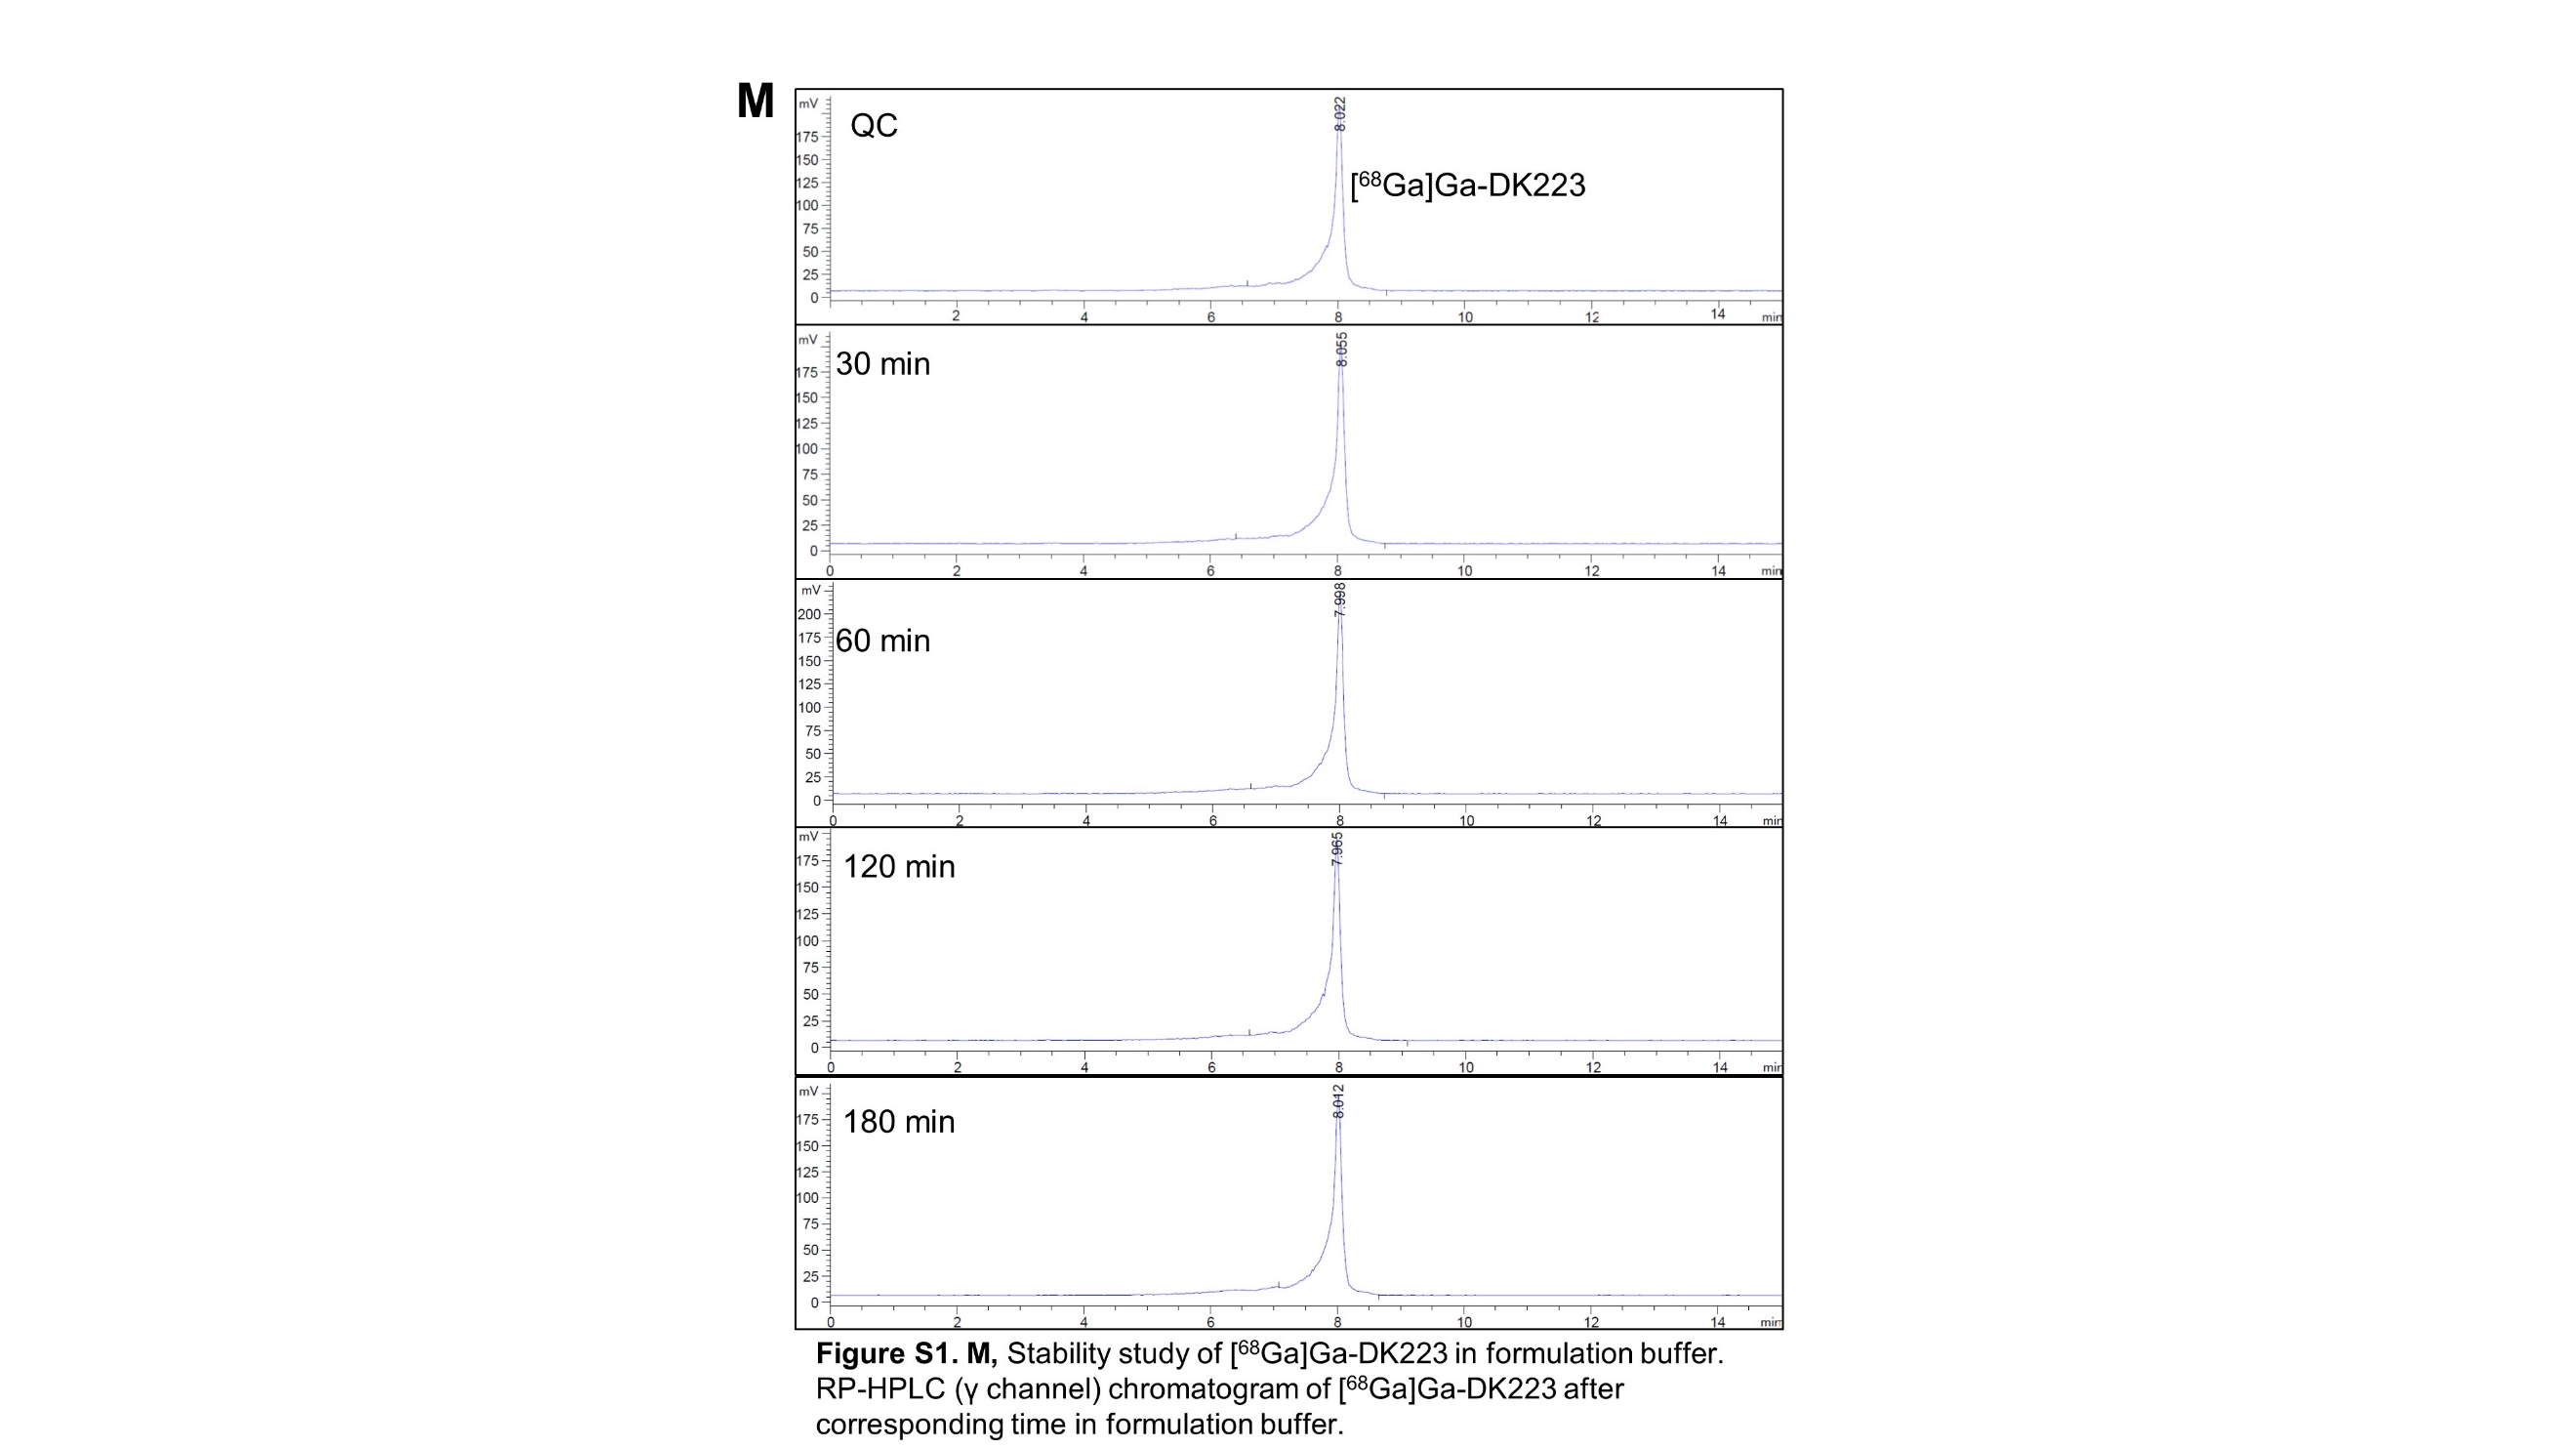


**Figure S1. M,** Stability study of [68Ga]Ga-DK223 in formulation buffer. RP-HPLC chromatogram of [68Ga]Ga-DK223 at the corresponding time-point.
