# Supplementary material for: Gallium-68–labeled Peptide PET Quantifies Tumor Exposure of PD-L1 Therapeutics
Source: Oxford University Press journal article supplement (doi:10.1158/1078-0432.ccr-22-1931), 2022-11-30
Supplement: ccr-22-1931_supplementary_figure_s4_supps4.docx [file ccr-22-1931_supplementary_figure_s4_supps4.docx]

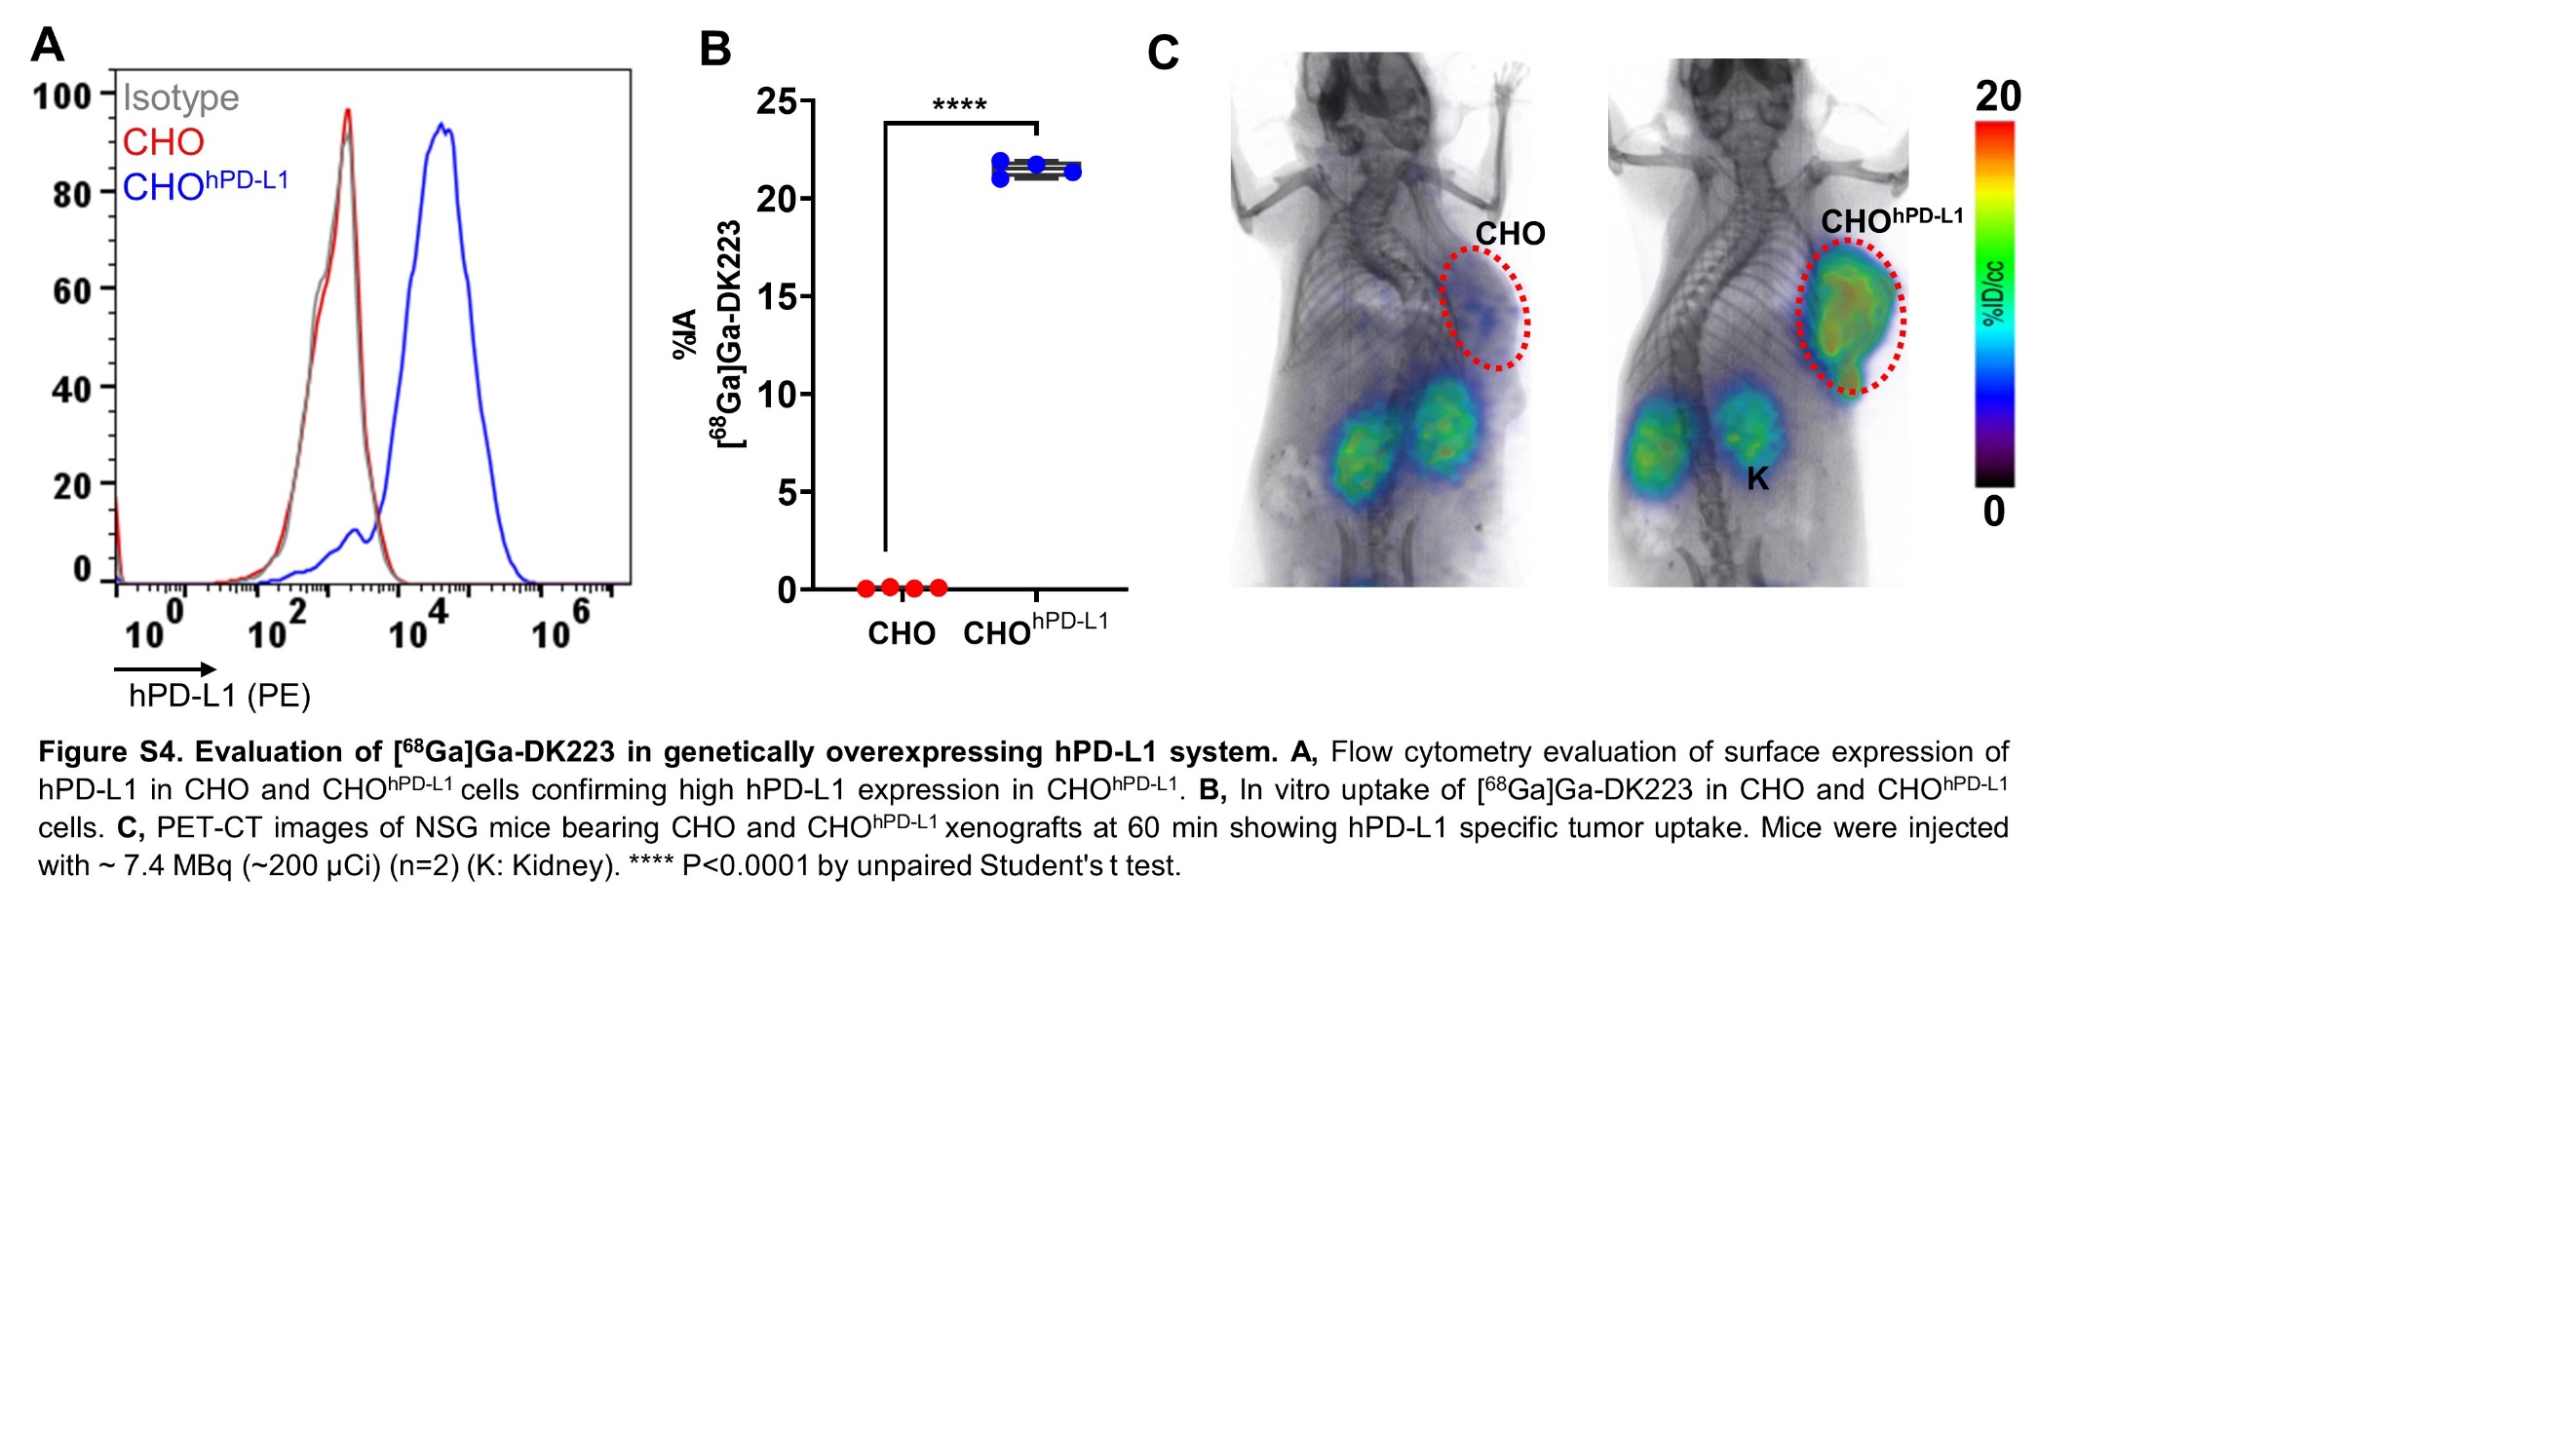


**Figure S4.** **Evaluation of [68Ga]Ga-DK223 in genetically hPD-L1 overexpressing model. A,** Flow cytometry evaluation of surface expression of hPD-L1 in CHO and CHOhPD-L1 cells. **B,** In vitro uptake of [68Ga]Ga-DK223 in CHO and CHOhPD-L1 cells. **C,** PET-CT images of NSG mice bearing CHO and CHOhPD-L1 xenografts at 60 min showing high tumor uptake in CHOhPD-L1. Mice were injected with ~ 7.4 MBq (~200 µCi) (n=2) (K: Kidney). **** P<0.0001 by unpaired Student's t test.
